# Supplementary material for: Anthranilic Acid Inhibitors of Undecaprenyl Pyrophosphate Synthase (UppS), an Essential Enzyme for Bacterial Cell Wall Biosynthesis
Source: PubMed Central journal article supplement (PMC6339874; doi:10.3389/fmicb.2018.03322), 2019-01-14
Supplement: Table_1.pdf [file Table_1.pdf]

# **Anthranilic acid inhibitors of undecaprenyl pyrophosphate synthase (UppS), an essential enzyme in bacterial cell wall synthesis**

## **Supplementary data**

*Marko Jukič<sup>1</sup>, Kaja Rožman<sup>1</sup>, Matej Sova<sup>1</sup>, Hélène Barreteau<sup>2</sup>, Stanislav Gobec<sup>1\*</sup>*

<sup>1</sup>Faculty of Pharmacy, University of Ljubljana, Aškerčeva 7, SI-1000 Ljubljana, Slovenia

<sup>2</sup>Bacterial Cell Envelopes and Antibiotics Group, Institute for Integrative Biology of the Cell (I2BC), CEA, CNRS, University of Paris Sud, Université Paris-Saclay, 91198 Gif-sur-Yvette cedex, France

\*CORRESPONDENCE: Stanislav Gobec, E-mail: [stanislav.gobec@ffa.uni-lj.si](mailto:stanislav.gobec@ffa.uni-lj.si), Phone +38614769585.

## *Computer Hardware*

The compound database preparation, MD and all of the computations were carried out on a four eight-core AMD Opteron 6128 Magny-Cours workstation with 32 GB RAM, two 1 TB HDD, running 64-bit Ubuntu Linux 16.04.2. The binding-site preparation and preparation of images was conducted on a two quad-core Intel Xeon 2.2 GHz workstation with 16 GB RAM, 1 TB HDD, 1 TB SSD and an Nvidia GTX 1050 graphic card, running 64-bit Debian Linux and on a workstation with 8-core Intel i7 Haswell 4710, 2.5 GHz processors, with 8 GB RAM and one 1 TB hard drive (WD), while running 64-bit Microsoft Windows 8.1 operating system.

## *Pharmacophore model design*

The pharmacophore model was designed using LigandScout program based on the known UppS inhibitor **1 (BPH-629)**, while taking in consideration the known interactions of the bisphosphonate with the enzyme (PDB ID: 2E98).<sup>1</sup> Specific fragments or functional groups of the inhibitor were used to pinpoint the desired type of interactions with the enzyme and thus formed the final pharmacophore model. More specifically: Negative ionisable feature at position 39.97, 44.00, 56.39 measuring 2.2 Å in diameter and weight 1; H-bond acceptor feature at position 37.35, 42.49, 56.48 measuring 2.35 Å in diameter and weight 1. Additionally, aliphatic hydroxyl group was marked as hydrophilic H-bond donor feature (position: 39.57, 41.81, 57.82; 1.6 Å in diameter; weight 1) and distant aromatic ring as a hydrophobic feature of the pharmacophore (2.4 Å in diameter; position: 43.43, 32.83, 54.88; weight 1). Finally, the exclusion zones predicted by the LigandScout 4.2 program<sup>1</sup> have been included in the final pharmacophore model. Such exclusion zones arise from the protein amino acid residues or water molecules bound in the crystal during the crystallization.

## *Exclusion zone list:*

```
</point><volume type="exclusion" featureId="1763848723011623622" optional="false" disabled="false" weight="1.0" id="feature4"><position x3="40.3246" y3="37.3536" z3="52.3292" tolerance="1.5" /></volume><volume type="exclusion" featureId="1763848614627643268" optional="false" disabled="false" weight="1.0" id="feature5"><position x3="38.889" y3="33.75" z3="53.768" tolerance="1.5" /></volume><volume type="exclusion" featureId="1763848719978313618" optional="false" disabled="false" weight="1.0" id="feature6"><position x3="37.471" y3="38.709" z3="58.208" tolerance="1.0" /></volume><volume type="exclusion" featureId="177340598843862159497" optional="false" disabled="false" weight="1.0" id="feature7"><position x3="44.162" y3="35.428" z3="51.483944" tolerance="1.5" /></volume><volume type="exclusion" featureId="177340600217976159501" optional="false" disabled="false" weight="1.0" id="feature8"><position x3="47.162" y3="35.428" z3="54.483944" tolerance="1.5" /></volume><volume type="exclusion" featureId="1763848656649313616" optional="false" disabled="false" weight="1.0" id="feature9"><position x3="42.446" y3="42.77" z3="58.672" tolerance="1.0" /></volume><volume type="exclusion" featureId="1763848819838215000" optional="false" disabled="false" weight="1.0" id="feature10"><position x3="34.759" y3="35.755" z3="53.94" tolerance="1.0" /></volume><volume
```

```

type="exclusion" featureId="1763848609755523215" optional="false" disabled="false" weight="1.0"
id="feature11"><position x3="40.6928" y3="30.906334" z3="57.625645" tolerance="1.5" /></volume><volume
type="exclusion" featureId="1763848821984915003" optional="false" disabled="false" weight="1.0"
id="feature12"><position x3="42.218" y3="39.636" z3="61.745" tolerance="1.0" /></volume><volume
type="exclusion" featureId="1763848825360335004" optional="false" disabled="false" weight="1.0"
id="feature13"><position x3="37.041" y3="40.224" z3="50.753" tolerance="1.0" /></volume><volume
type="exclusion" featureId="177340600287537159502" optional="false" disabled="false" weight="1.0"
id="feature14"><position x3="47.162" y3="36.928" z3="58.983944" tolerance="1.5" /></volume><volume
type="exclusion" featureId="1763848748977254480" optional="false" disabled="false" weight="1.0"
id="feature15"><position x3="43.4544" y3="33.8126" z3="61.625" tolerance="1.5" /></volume><volume
type="exclusion" featureId="1763848825853535005" optional="false" disabled="false" weight="1.0"
id="feature16"><position x3="38.629" y3="43.416" z3="51.996" tolerance="1.0" /></volume><volume
type="exclusion" featureId="1763848820382735001" optional="false" disabled="false" weight="1.0"
id="feature17"><position x3="33.873" y3="39.248" z3="55.195" tolerance="1.0" /></volume><volume
type="exclusion" featureId="177340597138193159494" optional="false" disabled="false" weight="1.0"
id="feature18"><position x3="41.162" y3="33.928" z3="48.483944" tolerance="1.5" /></volume><volume
type="exclusion" featureId="1763848720414493620" optional="false" disabled="false" weight="1.0"
id="feature19"><position x3="35.377" y3="40.898" z3="59.361" tolerance="1.0" /></volume><volume
type="exclusion" featureId="176384875726864999" optional="false" disabled="false" weight="1.0"
id="feature20"><position x3="40.518" y3="44.797" z3="52.6" tolerance="1.0" /></volume><volume
type="exclusion" featureId="177340600146990159500" optional="false" disabled="false" weight="1.0"
id="feature21"><position x3="47.162" y3="32.428" z3="58.983944" tolerance="1.5" /></volume><volume
type="exclusion" featureId="177340595092701159492" optional="false" disabled="false" weight="1.0"
id="feature22"><position x3="38.162" y3="29.428" z3="52.983944" tolerance="1.5" /></volume><volume
type="exclusion" featureId="1763848613684013242" optional="false" disabled="false" weight="1.0"
id="feature23"><position x3="44.365" y3="31.098" z3="50.167202" tolerance="1.5" /></volume><volume
type="exclusion" featureId="1763848572557513209" optional="false" disabled="false" weight="1.0"
id="feature24"><position x3="36.673" y3="43.301" z3="60.261" tolerance="1.0" /></volume><volume
type="exclusion" featureId="1763848595726443212" optional="false" disabled="false" weight="1.0"
id="feature25"><position x3="42.937" y3="45.884" z3="54.159" tolerance="1.0" /></volume><volume
type="exclusion" featureId="1763848739173144461" optional="false" disabled="false" weight="1.0"
id="feature26"><position x3="37.15" y3="45.041" z3="52.932" tolerance="1.0" /></volume><volume
type="exclusion" featureId="1763848596128413214" optional="false" disabled="false" weight="1.0"
id="feature27"><position x3="43.218" y3="46.153" z3="56.446" tolerance="1.0" /></volume><volume
type="exclusion" featureId="1763848820602245002" optional="false" disabled="false" weight="1.0"
id="feature28"><position x3="33.126" y3="41.108" z3="58.4" tolerance="1.0" /></volume><volume
type="exclusion" featureId="1763848613578533241" optional="false" disabled="false" weight="1.0"
id="feature29"><position x3="45.046" y3="29.32" z3="52.184" tolerance="1.5" /></volume><volume
type="exclusion" featureId="17734059869191159496" optional="false" disabled="false" weight="1.0"
id="feature30"><position x3="44.162" y3="29.428" z3="60.483944" tolerance="1.5" /></volume><volume
type="exclusion" featureId="177340600741679159503" optional="false" disabled="false" weight="1.0"
id="feature31"><position x3="48.662" y3="32.428" z3="51.483944" tolerance="1.5" /></volume><volume
type="exclusion" featureId="17734060008153159499" optional="false" disabled="false" weight="1.0"
id="feature32"><position x3="47.162" y3="29.428" z3="55.983944" tolerance="1.5" /></volume><volume
type="exclusion" featureId="1763848738816794459" optional="false" disabled="false" weight="1.0"
id="feature33"><position x3="34.662" y3="44.771" z3="54.241" tolerance="1.0" /></volume><volume
type="exclusion" featureId="177340601329241159504" optional="false" disabled="false" weight="1.0"
id="feature34"><position x3="50.162" y3="32.428" z3="55.983944" tolerance="1.5" /></volume><volume
type="exclusion" featureId="1763848775093974997" optional="false" disabled="false" weight="1.0"
id="feature35"><position x3="38.44" y3="47.164" z3="53.875" tolerance="1.0" /></volume><volume
type="exclusion" featureId="177340596819752159493" optional="false" disabled="false" weight="1.0"
id="feature36"><position x3="41.162" y3="26.428" z3="54.483944" tolerance="1.5" /></volume><volume
type="exclusion" featureId="177340598616078159495" optional="false" disabled="false" weight="1.0"
id="feature37"><position x3="44.162" y3="26.428" z3="57.483944" tolerance="1.5"

```

### *Compound Database Preparation and Ligand-based Screening*

For the virtual screening, the 'ZINC Drugs Now' subset with 10.7 million drug-like compounds was used.<sup>2</sup> Prior to the docking, hierarchical filtering of the compound database was performed with the aim to remove unwanted compounds. The 'ZINC Drugs Now' subset was first processed with the FILTER 2.5.1.4 application<sup>3</sup> to eliminate the known or predicted

aggregators<sup>4</sup> and the compounds with predicted poor solubility. The following filter configuration file was applied:

```
ELIMINATE METALS  
  
MIN_MOLWT 300  
MAX_MOLWT 1000  
MIN_ROT_BONDS 0  
MAX_ROT_BONDS 15  
MIN_RIGID_BONDS 4  
MAX_RIGID_BONDS 55  
MIN_XLOG_P -4.0  
MAX_XLOG_P 6.85  
MIN_SOLUBILITY poorly "Minimum solubility"  
AGGREGATORS true "Eliminate known aggregators"  
PRED_AGG true "Eliminate predicted aggregators"
```

The library was further processed with an in-house Python scripts capable of removing the PAINS compounds and filtered for REOS structures.<sup>5</sup> The resulting filtered library consisted of roughly 6.5 million compounds. Next, the 3D conformer database was prepared with Openeye (OpenEye Scientific Software, Inc., Santa Fe, NM, USA; [www.eyesopen.com](http://www.eyesopen.com)) omega2 fast protocol within LigandScout. Maximum number of conformations was set at 25, rms threshold of 0.8 was used and energy window of 10 with 4,000 max pool size with ring and nitrogen enumeration. Final LigandScout ldb database was created using idbgen software from Inte:Ligand (Software- Entwicklungs und Consulting GmbH, Maria Enzersdorf, Austria). Prepared conformer library was filtered further using a newly designed pharmacophore model based on the bisphosphonate inhibitor **BPH-629** (detailed description in the previous subsection) with screening protocol within LigandScout<sup>1</sup> (iscreen software; Software- Entwicklungs und Consulting GmbH, Maria Enzersdorf, Austria). Used parameters were: Pharmacophore-Fit scoring function and match all query features screening mode. Retrieval mode was: Stop after first matching conformation. Max number of omitted features was 1 and exclusion spheres were employed in the calculation. Thus the final enriched library used for the structure-based virtual screening consisted of 13 530 compounds and was used for the structure-based virtual screening.

*Structure-Based Virtual Screening – compound list*<sup>6,7</sup>

**Table S1: List of top-scoring compounds in structure-based virtual screening model.**

| Compound                    | Vendors code           | Chemical structure                                                                  | GOLD.ChemScore.<br>Fitness | Molecular<br>weight<br>(g/mol) | % of<br>inhibition                | MIC ( $\mu\text{g/mL}$ ) |                  |
|-----------------------------|------------------------|-------------------------------------------------------------------------------------|----------------------------|--------------------------------|-----------------------------------|--------------------------|------------------|
|                             |                        |                                                                                     |                            |                                |                                   | <i>E. coli</i>           | <i>S. aureus</i> |
| <b>S1</b><br>(main text: 1) | <b>STK093750</b>       | 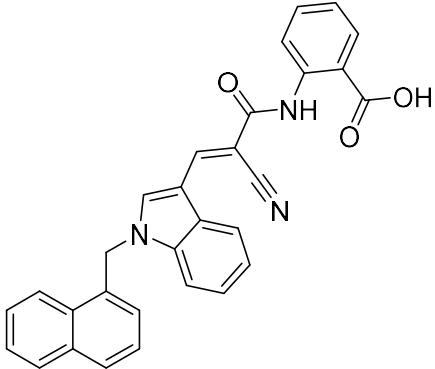  | 41.8266                    | 471.52                         | $\text{IC}_{50} = 45 \mu\text{M}$ | > 128                    | > 128            |
| <b>S2</b>                   | <b>AG-205/05893006</b> |  | 38.3248                    | 486.53                         | 58                                | > 128                    | > 128            |

|    |                 |                                                                                      |         |        |     |       |       |
|----|-----------------|--------------------------------------------------------------------------------------|---------|--------|-----|-------|-------|
| S3 | AQ-360/42570543 | 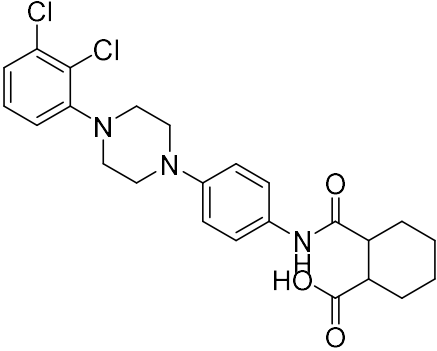   | 37.6963 | 476.40 | 96  | > 128 | > 128 |
| S4 | IBS-L0207254    |    | 35.7491 | 524.59 | 101 | > 128 | > 128 |
| S5 | STL157126       |   | 34.9051 | 369.81 | 115 | > 128 | > 128 |
| S6 | AQ-360/42570550 |  | 34.8710 | 421.54 | 53  | > 128 | > 128 |

|                       |                 |                                                                                     |         |        |                          |       |       |
|-----------------------|-----------------|-------------------------------------------------------------------------------------|---------|--------|--------------------------|-------|-------|
| S7                    | AG-690/33916006 | 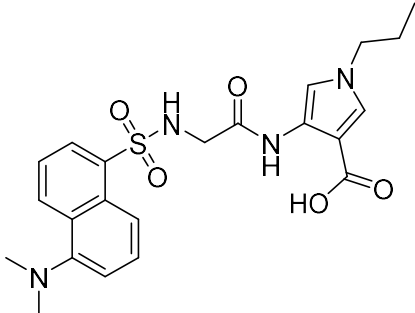  | 33.5441 | 458.53 | 85                       | > 128 | > 128 |
| S8                    | PB56864753      |   | 33.3548 | 539.55 | 92                       | > 128 | > 128 |
| S9                    | 7126272         |   | 33.1160 | 350.38 | 72                       | > 128 | > 128 |
| S10<br>(main text: 3) | STL365344       |  | 32.9201 | 470.50 | IC <sub>50</sub> = 24 μM | > 128 | > 128 |



|     |                 |                                                                                      |         |        |     |       |       |
|-----|-----------------|--------------------------------------------------------------------------------------|---------|--------|-----|-------|-------|
| S11 | AG-690/33098016 | 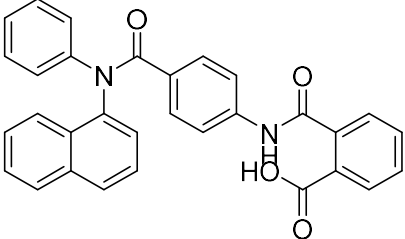   | 32.8162 | 486.53 | 60  | > 128 | > 128 |
| S12 | AG-205/34698038 |    | 32.5918 | 414.48 | 120 | > 128 | > 128 |
| S13 | Z55988003       |    | 30.3264 | 422.44 | 92  | > 128 | > 128 |
| S14 | STK043985       |   | 30.1626 | 450.49 | 101 | > 128 | 128   |
| S15 | Z2242878632     |  | 30.0135 | 368.43 | 124 | > 128 | > 128 |

|     |                 |                                                                                      |         |        |     |       |       |
|-----|-----------------|--------------------------------------------------------------------------------------|---------|--------|-----|-------|-------|
| S16 | AQ-360/42570784 | 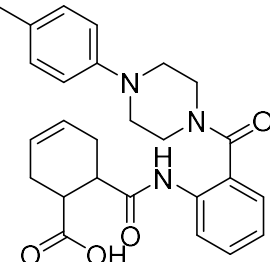   | 29.1905 | 447.54 | 104 | > 128 | > 128 |
| S17 | Z1445398572     |    | 28.5765 | 373.43 | 70  | > 128 | > 128 |
| S18 | J047-0617       |    | 28.1411 | 484.53 | 122 | > 128 | > 128 |
| S19 | AQ-360/42570789 |   | 28.0565 | 451.50 | 99  | > 128 | > 128 |
| S20 | Z1537404453     |  | 27.1972 | 359.33 | 168 | > 128 | > 128 |

|                       |              |                                                                                      |         |        |                          |       |       |
|-----------------------|--------------|--------------------------------------------------------------------------------------|---------|--------|--------------------------|-------|-------|
| S21                   | F687-0934    | 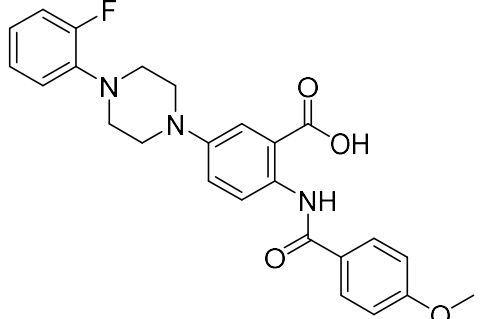   | 26.2106 | 449.48 | 74                       | > 128 | > 128 |
| S22                   | Z1444164038  |    | 25.2857 | 362.39 | 93                       | > 128 | > 128 |
| S23                   | IBS-L0125921 |    | 24.0976 | 303.36 | 117                      | > 128 | > 128 |
| S24<br>(main text: 2) | STK113564    |   | 23.9449 | 416.41 | IC <sub>50</sub> = 25 μM | > 128 | > 128 |
| S25                   | F687-0999    |  | 23.7389 | 465.93 | 121                      | > 128 | 64    |

|     |           |                                                                                     |         |        |     |       |       |
|-----|-----------|-------------------------------------------------------------------------------------|---------|--------|-----|-------|-------|
| S26 | STL123826 | 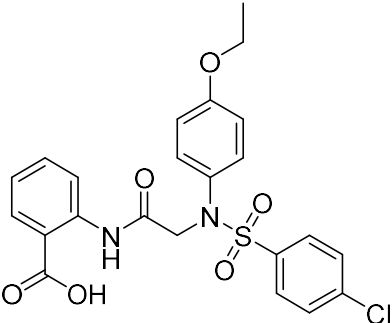  | 23.3255 | 488.94 | 102 | > 128 | 128   |
| S27 | STK541118 |   | 23.0163 | 367.38 | 99  | > 128 | > 128 |
| S28 | F684-0517 |  | 22.8636 | 485.64 | 113 | > 128 | > 128 |

|            |                  |                                                                                     |         |        |     |       |       |
|------------|------------------|-------------------------------------------------------------------------------------|---------|--------|-----|-------|-------|
| <b>S29</b> | <b>STL425508</b> | 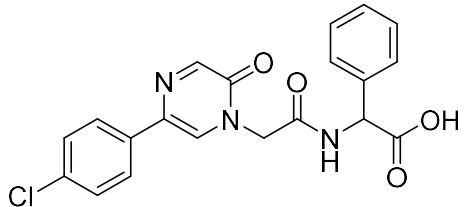  | 22.7323 | 397.82 | 96  | > 128 | > 128 |
| <b>S30</b> | <b>STL249593</b> |   | 21.4719 | 390.40 | 122 | > 128 | > 128 |
| <b>S31</b> | <b>F687-0385</b> |   | 21.4464 | 381.48 | 125 | > 128 | > 128 |
| <b>S32</b> | <b>STK292488</b> |  | 21.3059 | 319.74 | 122 | > 128 | > 128 |

|             |           |                                                                                    |         |        |     |       |       |
|-------------|-----------|------------------------------------------------------------------------------------|---------|--------|-----|-------|-------|
| S33         | STK068080 | 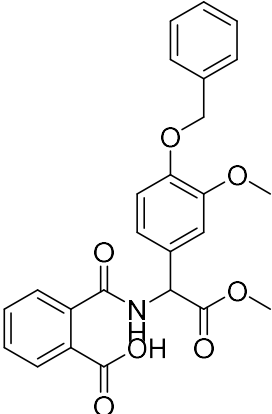 | 20.7217 | 449.46 | 65  | > 128 | > 128 |
| S34         | STK525524 |  | 15.2135 | 373.37 | 147 | > 128 | 128   |
| risedronate | /         |  | /       | 283.11 | /   | /     | /     |

### Compound characterization

Compounds were purchased from several vendors (compounds **1** and **2** from Alinda Chemical, Ltd., compounds **3-7** from ChemDiv Inc., compounds **8-12** from Enamine Ltd., compound **13** from Otava Ltd., compounds **14-21** from Specs, compound **22** from UkrOrgSynthesis Ltd., compounds **23-34** from Vitas-M and risedronate from Sigma-Aldrich) and were evaluated without further purification. Additionally, DMSO, NaCl, KCl, MgCl<sub>2</sub>, FPP and HEPES buffer were obtained from commercial sources (Sigma-Aldrich, Merck Millipore) and were used without further purification. The quantitative evaluation of UPP enzymatic production was determined on an optical radioactivity reader Rita Star (Raytest Isotopenmessgeräte GmbH, Straubenhardt, Germany). <sup>1</sup>H NMR spectra were recorded in DMSO-*d*<sub>6</sub> on a Bruker Avance 400 DPX 400 MHz spectrophotometer at 298 K. Chemical shifts are reported in ppm downfield from tetramethylsilane or solvents. The coupling constants (*J*) are in Hz, and the splitting patterns are designated as: s, singlet; br s, broad singlet; ds, doublet of singlet; d, doublet; dd, double doublet; ddd, triple doublet; t, triplet; dt, double triplet; and m, multiplet. ESI-HRMS mass spectra were recorded on Thermo Scientific™ Exactive™ Plus Orbitrap Mass Spectrometer at Faculty of Pharmacy in Ljubljana. The purity of purchased compounds was determined on a Thermo Scientific Dionex UltiMate 3000 HPLC system using an Agilent Extend-C18 3.5 μm column (4.6 × 150 mm), with a flow rate of 1.0 mL/min, injection volume 5 μL, and detection at several wavelength (210, 220, 254 and 280 nm). The following gradient was applied: 40 to 90% CH<sub>3</sub>CN/0.1% TFA in 12 min, then 2 min at 90% CH<sub>3</sub>CN/0.1% TFA and 1 min from 90 to 40% CH<sub>3</sub>CN/0.1% TFA.

*2-(2-((5-(benzofuran-2-yl)-4-phenyl-4H-1,2,4-triazol-3-yl)thio)acetamido)benzoic acid (25)*: White solid; <sup>1</sup>H NMR (400 MHz, CDCl<sub>3</sub>, δ) ppm 4.36 (s, 2H, CH<sub>2</sub>), 6.50 (s, 1H, Ar-H), 7.02 (s, 1H, Ar-H), 7.10-7.17 (m, 1H, Ar-H), 7.21-7.27 (m, 2H, Ar-H), 7.30-7.36 (m, 2H, Ar-H), 7.40-7.50 (m, 2H, Ar-H), 7.54 (s, 1H, Ar-H), 7.60-7.71 (m, 2H, Ar-H), 8.10-8.15 (m, 1H, Ar-H), 8.67-8.69 (m, 1H, Ar-H), 11.83 (s, 1H, NH), COOH is exchanged; ESI-HRMS ([M+H<sup>+</sup>], (m/z)) Calculated for C<sub>25</sub>H<sub>18</sub>N<sub>4</sub>O<sub>4</sub>S: 471.1115, Found 471.1121; HPLC: t<sub>R</sub> = 9.407 min (98 %).

*(E)-2-(2-cyano-3-(1-(naphthalen-1-ylmethyl)-1H-indol-3-yl)acrylamido)benzoic acid (29)*: Yellow solid; <sup>1</sup>H NMR (400 MHz, CDCl<sub>3</sub>, δ) ppm 4.79-4.84 (m, 1H, Ar-H), 5.64-5.69 (m, 1H, Ar-H), 5.76-5.81 (m, 1H, Ar-H), 6.12-6.18 (m, 2H, CH<sub>2</sub>), 6.67-6.71 (m, 1H, Ar-H), 6.79-

6.88 (m, 2H, Ar-H), 6.90-7.00 (m, 3H, Ar-H), 7.18-7.22 (m, 1H, Ar-H), 7.37-7.39 (m, 1H, Ar-H), 7.43-7.51 (m, 3H, Ar-H and CH), 7.59-7.61 (m, 1H, Ar-H), 8.33-8.36 (m, 1H, Ar-H), 8.50 (s, 1H, Ar-H), 11.10 (s, 1H, NH), COOH is exchanged; ESI-HRMS ([M-H<sup>+</sup>], (m/z)) Calculated for C<sub>30</sub>H<sub>21</sub>N<sub>3</sub>O<sub>3</sub>: 470.1499, Found 470.1512; HPLC: t<sub>R</sub> = 12.937 min (95 %).

*(E)*-2-(2-cyano-3-(3-((4-fluorobenzyl)oxy)phenyl)acrylamido)benzoic acid (**31**): White solid; <sup>1</sup>H NMR (400 MHz, methanol-*d*<sub>4</sub>, δ) ppm 5.16 (s, 2H, CH<sub>2</sub>), 7.10-7.15 (m, 2H, Ar-H), 7.17-7.24 (m, 2H, Ar-H), 7.45-7.53 (m, 4H, Ar-H), 7.60-7.83 (m, 1H, Ar-H), 7.74-7.75 (m, 1H, Ar-H), 8.12-8.14 (m, 1H, Ar-H), 8.33 (s, 1H, CH), 8.63-8.65 (m, 1H, Ar-H), COOH and amide NH are exchanged; ESI-HRMS ([M-H<sup>+</sup>], (m/z)) Calculated for C<sub>24</sub>H<sub>17</sub>FN<sub>2</sub>O<sub>4</sub>: 415.1089, Found 415.1102; HPLC: t<sub>R</sub> = 11.910 min (97 %).

### *MD trajectory clustering with ClusCo*<sup>8</sup>

10 clusters formation and centroid definition (flagged by a star in the output log) as calculated by ClusCo.

# Score: rmsd

# Filename: filelist.txt (conformers: 201)

# Hierarchical clustering, pairwise average-linkage, K=10

0 :            model\_140.pdb : 0.478 : 1.1 : model\_100.pdb model\_101.pdb model\_102.pdb model\_104.pdb  
model\_105.pdb model\_106.pdb model\_107.pdb model\_109.pdb model\_110.pdb model\_113.pdb model\_114.pdb  
model\_115.pdb model\_116.pdb model\_117.pdb model\_118.pdb model\_119.pdb model\_122.pdb model\_123.pdb  
model\_124.pdb model\_126.pdb model\_127.pdb model\_128.pdb model\_129.pdb model\_130.pdb model\_131.pdb  
model\_132.pdb model\_134.pdb model\_135.pdb model\_136.pdb model\_137.pdb model\_138.pdb model\_139.pdb  
model\_140.pdb model\_141.pdb model\_143.pdb model\_144.pdb model\_146.pdb model\_147.pdb model\_148.pdb  
model\_149.pdb model\_150.pdb model\_152.pdb model\_153.pdb model\_157.pdb model\_158.pdb model\_159.pdb  
model\_160.pdb model\_161.pdb model\_162.pdb model\_163.pdb model\_164.pdb model\_165.pdb model\_166.pdb  
model\_167.pdb model\_170.pdb model\_172.pdb model\_173.pdb model\_175.pdb model\_176.pdb model\_178.pdb  
model\_181.pdb model\_182.pdb model\_183.pdb model\_185.pdb model\_188.pdb model\_189.pdb model\_190.pdb  
model\_194.pdb model\_196.pdb model\_197.pdb model\_198.pdb model\_199.pdb model\_200.pdb model\_201.pdb  
model\_68.pdb model\_69.pdb model\_70.pdb model\_71.pdb model\_72.pdb model\_74.pdb model\_77.pdb  
model\_82.pdb model\_83.pdb model\_84.pdb model\_85.pdb model\_86.pdb model\_87.pdb model\_89.pdb  
model\_90.pdb model\_91.pdb model\_92.pdb model\_95.pdb model\_96.pdb model\_97.pdb model\_98.pdb  
model\_99.pdb

1 :            model\_41.pdb : 0.204 : 1.2 : model\_10.pdb model\_11.pdb model\_12.pdb model\_13.pdb  
model\_14.pdb model\_15.pdb model\_16.pdb model\_17.pdb model\_18.pdb model\_19.pdb model\_20.pdb  
model\_21.pdb model\_22.pdb model\_23.pdb model\_24.pdb model\_25.pdb model\_28.pdb model\_29.pdb  
model\_30.pdb model\_31.pdb model\_32.pdb model\_33.pdb model\_34.pdb model\_35.pdb model\_36.pdb  
model\_37.pdb model\_38.pdb model\_39.pdb model\_40.pdb model\_41.pdb model\_42.pdb model\_43.pdb  
model\_44.pdb model\_61.pdb model\_64.pdb model\_65.pdb model\_6.pdb model\_78.pdb model\_7.pdb  
model\_8.pdb model\_9.pdb

2 :            model\_80.pdb : 0.164 : 1.1 : model\_103.pdb model\_108.pdb model\_111.pdb model\_112.pdb  
model\_142.pdb model\_151.pdb model\_154.pdb model\_155.pdb model\_156.pdb model\_168.pdb model\_169.pdb  
model\_46.pdb model\_47.pdb model\_48.pdb model\_49.pdb model\_50.pdb model\_51.pdb model\_53.pdb  
model\_56.pdb model\_57.pdb model\_58.pdb model\_59.pdb model\_60.pdb model\_62.pdb model\_63.pdb



model\_73.pdb model\_75.pdb model\_76.pdb model\_79.pdb model\_80.pdb model\_81.pdb model\_93.pdb  
model\_94.pdb

3 : model\_133.pdb : 0.0746 : 1.2 : model\_121.pdb model\_125.pdb model\_133.pdb model\_145.pdb  
model\_171.pdb model\_174.pdb model\_177.pdb model\_179.pdb model\_180.pdb model\_184.pdb model\_187.pdb  
model\_191.pdb model\_193.pdb model\_195.pdb model\_88.pdb

4 : model\_52.pdb : 0.0348 : 1.1 : model\_26.pdb model\_27.pdb model\_45.pdb model\_52.pdb  
model\_55.pdb model\_66.pdb model\_67.pdb

5 : model\_5.pdb : 0.0199 : 0.95 : model\_1.pdb model\_3.pdb model\_4.pdb model\_5.pdb

6 : model\_192.pdb : 0.00995 : 1.1 : model\_120.pdb model\_192.pdb

7 : model\_2.pdb : 0.00498 : 0 : model\_2.pdb

8 : model\_186.pdb : 0.00498 : 0 : model\_186.pdb

9 : model\_54.pdb : 0.00498 : 0 : model\_54.pdb

# Score: rmsd

# Filename: filelist.txt (conformers: 201)

# Hierarchical clustering, pairwise average-linkage, K=10

model\_100.pdb 5

model\_101.pdb 5

model\_102.pdb 5

model\_103.pdb 6

model\_104.pdb 5

model\_105.pdb 5

model\_106.pdb 5

model\_107.pdb 5

model\_108.pdb 6

model\_109.pdb 5

model\_10.pdb 3

model\_110.pdb 5

model\_111.pdb 6

model\_112.pdb 6

model\_113.pdb 5

model\_114.pdb 5

model\_115.pdb 5

model\_116.pdb 5  
model\_117.pdb 5  
model\_118.pdb 5  
model\_119.pdb 5  
model\_11.pdb 3  
model\_120.pdb 8  
model\_121.pdb 4  
model\_122.pdb 5  
model\_123.pdb 5  
model\_124.pdb 5  
model\_125.pdb 4  
model\_126.pdb 5  
model\_127.pdb 5  
model\_128.pdb 5  
model\_129.pdb 5  
model\_12.pdb 3  
model\_130.pdb 5  
model\_131.pdb 5  
model\_132.pdb 5  
model\_133.pdb 4 \*  
model\_134.pdb 5  
model\_135.pdb 5  
model\_136.pdb 5  
model\_137.pdb 5  
model\_138.pdb 5  
model\_139.pdb 5  
model\_13.pdb 3  
model\_140.pdb 5 \*  
model\_141.pdb 5  
model\_142.pdb 6  
model\_143.pdb 5  
model\_144.pdb 5  
model\_145.pdb 4

model\_146.pdb 5  
model\_147.pdb 5  
model\_148.pdb 5  
model\_149.pdb 5  
model\_14.pdb 3  
model\_150.pdb 5  
model\_151.pdb 6  
model\_152.pdb 5  
model\_153.pdb 5  
model\_154.pdb 6  
model\_155.pdb 6  
model\_156.pdb 6  
model\_157.pdb 5  
model\_158.pdb 5  
model\_159.pdb 5  
model\_15.pdb 3  
model\_160.pdb 5  
model\_161.pdb 5  
model\_162.pdb 5  
model\_163.pdb 5  
model\_164.pdb 5  
model\_165.pdb 5  
model\_166.pdb 5  
model\_167.pdb 5  
model\_168.pdb 6  
model\_169.pdb 6  
model\_16.pdb 3  
model\_170.pdb 5  
model\_171.pdb 4  
model\_172.pdb 5  
model\_173.pdb 5  
model\_174.pdb 4  
model\_175.pdb 5

model\_176.pdb 5  
model\_177.pdb 4  
model\_178.pdb 5  
model\_179.pdb 4  
model\_17.pdb 3  
model\_180.pdb 4  
model\_181.pdb 5  
model\_182.pdb 5  
model\_183.pdb 5  
model\_184.pdb 4  
model\_185.pdb 5  
model\_186.pdb 2 \*  
model\_187.pdb 4  
model\_188.pdb 5  
model\_189.pdb 5  
model\_18.pdb 3  
model\_190.pdb 5  
model\_191.pdb 4  
model\_192.pdb 8 \*  
model\_193.pdb 4  
model\_194.pdb 5  
model\_195.pdb 4  
model\_196.pdb 5  
model\_197.pdb 5  
model\_198.pdb 5  
model\_199.pdb 5  
model\_19.pdb 3  
model\_1.pdb 9  
model\_200.pdb 5  
model\_201.pdb 5  
model\_20.pdb 3  
model\_21.pdb 3  
model\_22.pdb 3

model\_23.pdb 3  
model\_24.pdb 3  
model\_25.pdb 3  
model\_26.pdb 7  
model\_27.pdb 7  
model\_28.pdb 3  
model\_29.pdb 3  
model\_2.pdb 1 \*  
model\_30.pdb 3  
model\_31.pdb 3  
model\_32.pdb 3  
model\_33.pdb 3  
model\_34.pdb 3  
model\_35.pdb 3  
model\_36.pdb 3  
model\_37.pdb 3  
model\_38.pdb 3  
model\_39.pdb 3  
model\_3.pdb 9  
model\_40.pdb 3  
model\_41.pdb 3 \*  
model\_42.pdb 3  
model\_43.pdb 3  
model\_44.pdb 3  
model\_45.pdb 7  
model\_46.pdb 6  
model\_47.pdb 6  
model\_48.pdb 6  
model\_49.pdb 6  
model\_4.pdb 9  
model\_50.pdb 6  
model\_51.pdb 6  
model\_52.pdb 7 \*

model\_53.pdb 6  
model\_54.pdb 0 \*  
model\_55.pdb 7  
model\_56.pdb 6  
model\_57.pdb 6  
model\_58.pdb 6  
model\_59.pdb 6  
model\_5.pdb 9 \*  
model\_60.pdb 6  
model\_61.pdb 3  
model\_62.pdb 6  
model\_63.pdb 6  
model\_64.pdb 3  
model\_65.pdb 3  
model\_66.pdb 7  
model\_67.pdb 7  
model\_68.pdb 5  
model\_69.pdb 5  
model\_6.pdb 3  
model\_70.pdb 5  
model\_71.pdb 5  
model\_72.pdb 5  
model\_73.pdb 6  
model\_74.pdb 5  
model\_75.pdb 6  
model\_76.pdb 6  
model\_77.pdb 5  
model\_78.pdb 3  
model\_79.pdb 6  
model\_7.pdb 3  
model\_80.pdb 6 \*  
model\_81.pdb 6  
model\_82.pdb 5

model\_83.pdb 5  
model\_84.pdb 5  
model\_85.pdb 5  
model\_86.pdb 5  
model\_87.pdb 5  
model\_88.pdb 4  
model\_89.pdb 5  
model\_8.pdb 3  
model\_90.pdb 5  
model\_91.pdb 5  
model\_92.pdb 5  
model\_93.pdb 6  
model\_94.pdb 6  
model\_95.pdb 5  
model\_96.pdb 5  
model\_97.pdb 5  
model\_98.pdb 5  
model\_99.pdb 5  
model\_9.pdb 3

### *Binding site examination*<sup>9</sup>

All 10 cluster centroids identified with ClusCo using MD trajectory data were superimposed on the starting crystalized protein conformation (PDB ID: 2E98) and the binding site was defined as an area of 7 Å around the co-crystallized ligand BPH-629 in binding site 1. SiteMap software from Schrödinger (Schrödinger Release 2018-3: SiteMap, Schrödinger, LLC, New York, NY, 2018) was used to calculate binding site areas and surfaces.<sup>9, 10</sup> Used parameters were 15 site points per reported site (minimum site size), more restrictive definition of hydrophobicity (eliminating points that are adjacent to hydrophilic regions and assigning reduced hydrophobicity to solvent-exposed regions) and standard grid resolution (0.7 Å). Data for the reference crystal structure is as follows: binding site surface (Å<sup>2</sup>): accptr-807.244; donor-840.011; phil-1581.452; phob-303.806; surf-2847.953 and binding site volume of 853.727 Å<sup>3</sup>. Data for selected cluster centroids is presented in Table S2.

**Table S2: Binding site surface areas and binding site volumes of clustered protein centroid conformations**

| centroid conformation no. | Surface Type and corresponding area (Å <sup>2</sup> ) |          |              |             |          | Binding site volume (Å <sup>3</sup> ) |
|---------------------------|-------------------------------------------------------|----------|--------------|-------------|----------|---------------------------------------|
|                           | acceptor                                              | donor    | hydrophillic | hydrophobic | surface  |                                       |
| 1                         | 919.127                                               | 1119.107 | 1961.304     | 279.929     | 3362.488 | 862.645                               |
| 2                         | 855.685                                               | 910.592  | 1707.388     | 459.005     | 3197.214 | 789.929                               |
| 3                         | 766.771                                               | 890.057  | 1686.257     | 316.344     | 3204.337 | 814.625                               |
| 4                         | 821.101                                               | 820.326  | 1642.737     | 320.038     | 3262.737 | 894.887                               |
| 5                         | 979.57                                                | 840.066  | 1811.742     | 399.324     | 3487.816 | 1002.932                              |
| 6                         | 978.3                                                 | 1010.715 | 1993.606     | 386.09      | 3862.864 | 932.960                               |
| 7                         | 1063.121                                              | 1132.784 | 2166.03      | 412.147     | 4002.275 | 1001.903                              |
| 8                         | 796.925                                               | 819.21   | 1592.704     | 435.629     | 3180.268 | 968.975                               |
| 9                         | 778.257                                               | 883.509  | 1644.696     | 398.738     | 3105.713 | 890.771                               |
| 10                        | 877.396                                               | 921.634  | 1801.628     | 385.566     | 3303.367 | 895.573                               |

*PAINS filtering (definitions of PAINS compounds in SMARTS format)*<sup>11</sup>

1. c:1:c:c:(c:c:c:1-[#6;X4]-c:2:c:c:c:(c:c:2)-[#7&H2,\$([#7;!H0]-[#6;X4]),\$([#7](-[#6X4]-[#6X4]))-[#7&H2,\$([#7;!H0]-[#6;X4]),\$([#7](-[#6X4]-[#6X4]))] <regId=anil\_di\_alk\_F(14)>
2. c:1:(c:c:(c:(c:(c:1-[#1])-[#1])-[#1])-[#1])-[#1])-[#1])-[#6]=[#7]-[#7]-[#1] <regId=hzone\_anil(14)>
3. c1(mn(c([c;!H0,\$(c-[#6;!H0])1)-[#8]-[#1])-[#1])-[#1])-[#1])-[#1])-[#1])-[#6;X4] <regId=het\_5\_pyrazole\_OH(14)>
4. c:2:(c:1-[#16]-c:3:c(-[#7;!H0,\$([#7]-[CH3]),\$([#7]-[#6;!H0;!H1]-[#6;!H0])](c:1:c:(c:c:2-[#1])-[#1])-[#1])):[c;!H0,\$(c-[#7](-[#1])-[#6;X4]),\$(c-[#6]:[#6])]:[c;!H0,\$(c-[#6]:[#6])]:[c;!H0,\$(c-[#7](-[#1])-[#1]),\$(c-[#8]-[#6;X4]):c:3-[#1])]-[#1] <regId=het\_thio\_666\_A(13)>
5. [#6]-2-[#6]-c:1:c:(c:c:c:1)-[#6](-c:3:c:c:c:c:2:3)=[#6]-[#6] <regId=styrene\_A(13)>
6. [#16]-1-[#6](=[#7]-[#6]:[#6])-[#7;!H0,\$([#7]-[#6](-[#1])-[#1])-[#6](-[#1])-[#1])-[#8]),\$([#7]-[#6]:[#6])]-[#6](=[#8])-[#6]-1=[#6](-[#1])-[#6]:[#6]:[#6]-[#17]),\$([#6]:[#6&!#1])] <regId=ene\_rhod\_C(13)>
7. [#7](-[#1])-[#1])-[#6]-1=[#6](-[#6]#[#7])-[#6](-[#1])-[#6]:[#6]-[#6](=[#6](-[#6]=[#6])-[#8]-1)-[#6](-[#1])-[#1] <regId=dhp\_amino\_CN\_A(13)>
8. [#8]=[#16](=[#8])-[#6](-[#6]#[#7])=[#7]-[#7]-[#1] <regId=cyano\_imine\_C(12)>
9. c:1:c:c:c:c:c:1-[#7](-[#1])-[#6](-[#16])-[#7](-[#1])-[#6](-[#1])-[#1])-[#6](-[#1])-[#1])-[#6](-[#1])-[#1])-[#7](-[#6](-[#1])-[#1])-c:2:c:c:c:c:2 <regId=thio\_urea\_A(12)>
10. c:1:c:(c:c:c:c:1)-[#7](-[#1])-c:2:c:(c:(s:2)-\$([#6]=[#8]),\$([#6]#[#7]),\$([#6](-[#8]-[#1])=[#6]))-[#7])-\$([#6]#[#7]),\$([#6](-[#7]):[#7]) <regId=thiophene\_amino\_B(12)>
11. [#6;X4]-1-[#6](-[#8])-[#7]-[#7]-[#6]-1=[#8] <regId=keto\_keto\_beta\_B(12)>
12. c:1:c-3:c:(c:c:c:1)-[#6]:2:[#7]:[!#1]:[#6]:[#6]:[#6]:2-[#6]-3=[#8] <regId=keto\_phenone\_A(11)>
13. [#6]-1(-[#6]([#6](-[#6]#[#7])-[#6]([#8])~[#7]~[#6]-1~[#8])-[#6](-[#1])-[#1])=[#6](-[#1])-[#6]:[#6] <regId=cyano\_pyridone\_C(11)>





54. c:1:(c:(c:(c:[c;!H0,\$(c-[#6;!H0;!H1])](o:1)-[#1]-[#1])-[#6;!H0,\$([#6]-[#6;!H0;!H1])]=[#7]-[#7]-[#1]-c:2:n:c:c:s:2  
<regId=hzone\_furan\_A(6)>
55. c:1:(c:(c:(c:(c:(c:1-[#7]-[#1])-[#16])(=[#8])(=[#8])-[#6]:2:[#6]:[#1]:[#6]:[#6]:[#6]:2)-[#1])-[#7]-[#6]-[#1])-[#1]-  
[#6]-[#1])-[#1])-[#1])-[#1] <regId=anil\_di\_alk\_H(6)>
56. n2c1cccnc1c2-[\$([#6]-[#1])-[#6]:[#6]),\$([#6]:[#8]:[#6])]-[#7]-[#6]:[#6]  
<regId=het\_65\_C(6)>
57. [#6]-1-[#7]-[#1]-[#7]-[#1]-[#6](=[#16])-[#7]-[#7]-1-[#1] <regId=thio\_urea\_F(6)>
58. c:1:(c:(c:(c:o:1)-[#6]-[#1])=!@[#6]-3-[#6](=[#8])-c:2:c:c:c:c:2-!#6&!#1]-3 <regId=ene\_five\_het\_I(6)>
59. [#8]=[#6]-1-[#6;X4]-[#6]-[#6](=[#8])-c:2:c:c:c:c:1-2 <regId=keto\_keto\_gamma(5)>
60. c:1:c:c-2:c:(c:c:1)-[#6]-c3cccc4noc-2c34)=[#8] <regId=quinone\_B(5)>
61. [#8]-[#1]-c:1:n:c:(c:c:1)-[#8]-[#1] <regId=het\_6\_pyridone\_OH(5)>
62. c:1:2:c:(c:(c:(c:1:c:(c:(c:2-[#1])-[#1])-[#6]=[#7]-[#7]-[#1])-[#6]:[#6]),\$([#6]=[#16]))-[#1]-[#1])-[#1]-  
[#1])-[#1] <regId=hzone\_naphth\_A(5)>
63. [#6]-,1=,:[#6](,:[#16]-,:[#6](,:[#6]=,:[#6]-,1)=[#16]),:[#7] <regId=thio\_ester\_A(5)>
64. [#6]-1=[#6]-[#6]-[#8]-[#6]-1-[#8]-[#6] <regId=ene\_misc\_A(5)>
65. [#8]=[#6]-,1-,:[#6](=,:[#6]-,:[#6](=,:[#7]-,:[#7]-,1),:[#6]=[#8])-[#6]#[#7] <regId=cyano\_pyridone\_D(5)>
66. c3cn1c(nc(c1-[#7]-[#6])-c:2:c:c:c:n:2)cc3 <regId=het\_65\_Db(5)>
67. [#7]-2-c:1:c:c:c:c:1-[#6](=[#7])-c:3:c:2:c:c:c:3 <regId=het\_666\_A(5)>
68. c:1:3:c:(c:c:c:1)-[#6]-2-[#6]-[#6]-[#6]-[#6]-2-[#1]-[#16](=[#8])(=[#8])-  
c:3:c:c:c:4:n:s:n:c:3:4 <regId=diazox\_sulfon\_B(5)>
69. c:1:(c:(c-,2:c:(c:(c:1-[#1])-[#1])-,:[#7](,:[#6](,:[#7]-,2-[#1])=[#8])-[#1]-[#1])-[#7]-[#1]-[#6]-[#1]-[#1]  
<regId=anil\_NH\_alk\_A(5)>
70. c:1:(c:(c-3:c:(c:(c:1-[#7]-[#1])-[#16])(=[#8])(=[#8])-c:2:c:c:c:(c:c:2)-!#6&!#1)-[#1]-[#8]-[#6]-[#8]-3)-[#1]-  
[#1])-[#1])-[#1] <regId=sulfonamide\_C(5)>
71. [#6]-[#1]-[#6]:2:[#7]:[#7]-c:1:c:c:c:c:1):[#16]:3:![#6&!#1]:![#1]:[#6]:[#6]:2:3 <regId=het\_thio\_N\_55(5)>
72. [#8]-[#6]-[#6]=[#6]-[#6]-[#8]-[#1] <regId=keto\_keto\_beta\_D(5)>
73. [#7]-,1-,2-,:[#6](=,:[#7]-,:[#6](=[#8])-,:[#6](=,:[#7]-,1)-[#6]-[#1]-[#1]),:[#16]-,:[#6](=[#6]-[#1]-[#6]:[#6])-  
,:[#6]-,2=[#8] <regId=ene\_rhod\_H(5)>
74. [#6]:[#6]-[#6]-[#1]=[#6]-[#1]-[#6]-[#1]=[#7]-[#7]-[#6;X4]-[#6;X4] <regId=imine\_ene\_A(5)>
75. c:1:3:c:(c:c:c:1):c:2:n:n:c(-[#16]-[#6]-[#1])-[#6]=[#8]:n:c:2:n:3-[#6]-[#1]-[#1]-[#6]-[#1]=[#6]-  
[#1]-[#1] <regId=het\_thio\_656a(5)>
76. n1(-[#6])c(c(-[#1])c(c1-[#6]-[#1])-[#7]-[#1]-[#6](=[#16])-[#7]-[#1]-[#1])-[#1] <regId=pyrrole\_D(5)>
77. n2(-[#6]:1:![#1]:![#6&!#1]:![#1]:[#6]:1-[#1])c(c(-[#1])c(c2-[#6;X4]-[#1]-[#6;X4] <regId=pyrrole\_E(5)>
78. c:1:(c:c:c:c:1)-[#7]-[#6]-[#6]-[#6]-[#6]-[#7]-[#7]-[#1]-[#6]([#7;R])[#7;R] <regId=thio\_urea\_G(5)>
79. c:1:(c:(c:(c:(c:[c;!H0,\$(c-[#6]-[#1])-[#1]):1)-[#1]-[#8]-[#6]-[#1]-[#1]-[#6]-[#1]-[#1])-[#6]-[#1]-[#1])-[#6]-  
[#6](=[#8])-[#6]-[#1]-[#1]-[#6]-[#1]-[#1]-[#6]-[#1]-[#1]),\$([#6]-[#1]-[#6]-[#1]-[#1])-[#7]-[#1]-  
[#6]-[#16]-[#7]-[#1]))-[#1]-[#8]-[#6]-[#1]-[#1] <regId=anisol\_A(5)>
80. n2(-[#6]:1:![#6]-[#6]#[#7]:[#6]:[#6]:![#6&!#1]:1)c(c(-[#1])c(c2)-[#1]-[#1] <regId=pyrrole\_F(5)>
81. [#7]-[#1]-[#6]-2=[#6]-[#6]#[#7]-[#6]-[#1]-[#6]:[#6]-c:1:c:(c:c:s:1)-[#8]-2  
<regId=dhp\_amino\_CN\_D(5)>
82. [#7]-[#1]-c:1:n:c:(c:s:1)-c:2:c:n:c(-[#7]-[#1]-[#1]):s:2 <regId=thiazole\_amine\_A(4)>
83. [#7]=[#6]-1-[#7]-[#1]-[#6](=[#6]-[#7]-[#1])-[#7]=[#7]-1)-[#7]-[#1] <regId=het\_6\_imidate\_A(4)>
84. c:1:c:(c:2:c:(c:c:1):c:c:c:c)-[#8]-c:3:c:(c:(c:(c:3-[#1])-[#1])-[#7]-[#1])-[#1])-[#1]  
<regId=anil\_OC\_no\_alk\_B(4)>
85. c:1:c:c-2:c:(c:c:1)-[#6]-[#16]-c3c(-[#6]-2=[#6])ccs3 <regId=styrene\_C(4)>
86. c:2:c:c:c:1:c:(c:c:c:1):c:c:2 <regId=azulene(4)>
87. c:1:(c:(c:(c:o:1)-[#6]-[#1])-[#1]-[#6]-[#6]-[#6]-[#6]-[#1]-[#6](=[#8])-[#8]-[#1]  
<regId=furan\_acid\_A(4)>
88. [!#1]:[#6]-[#6]-,1=,:[#6]-[#1]-,:[#6](=,:[#6]-[#6]#[#7]-,:[#6](=[#8])-,:[#7]-,1-[#1]-[#6]:[#8]  
<regId=cyano\_pyridone\_E(4)>
89. [#6]-1-3=[#6]-[#6]-[#7]-c:2:c:c:c:c:1:2)-[#6]-[#6]-[#16]-[#16]-[#6]-3=[!#1] <regId=anil\_alk\_thio(4)>
90. c:1:(c:(c:(c:(c:1-[#7]-[#1])-[#6](=[#8])-c:2:c:c:c:c:2)-[#1])-[#7]-[#6]-[#1]-[#1]-[#6]-[#1]-[#1])-[#1]-  
[#1])-[#1] <regId=anil\_di\_alk\_I(4)>
91. [#6]-[#1]-[#1]-[#16;X2]-c:1:n:n:c:(c:n:1)-c:2:c:(c:(c:o:2)-[#1]-[#1])-[#1]-c:3:c:(c:(c:o:3)-[#1]-[#1])-[#1]  
<regId=het\_thio\_6\_furan(4)>
92. [#6]-[#1]-[#6]-[#7]-[#6]-[#1]-[#1]-[#6]-2=[#6]-c:1:c:(c:c:c:1)-[#6]-2(-[#1])-[#1]  
<regId=anil\_di\_alk\_ene\_B(4)>
93. [#7]-[#1]-c:1:c:c:c:c:1)-[#7]=[#6]-[#6](=[#8])-[#6]-[#1]-[#1]-[#7]-[#1]-[\$([#7]-[#1]),\$([#6]:[#6])]  
<regId=imine\_one\_B(4)>
94. c:1:2:c:(c:(c:(c:1-[#1])-[#1])-[#1]):o:c:3:c(-[#1]):c:(c-[#8]-[#6]-[#1]-[#1]):c:(c:2:3)-[#1]-[#7]-[#1]-  
[#6]-[#1])-[#1] <regId=anil\_OC\_alk\_A(4)>
95. [#16]=[#6]-,1-,:[#7]-[#1]-,:[#6]=,:[#6]-,:[#6]-2=,:[#6]-,1-[#6](=[#8])-[#8]-[#6]-2=[#6]-[#1]  
<regId=ene\_five\_het\_J(4)>
96. n2(-c:1:c:(c:(c:c:1)-[#1])-[#6]-[#7]-[#1]),\$([#6]:[#7]))-[#1])c(c(-[#1])c(c2)-[#1]-[#1])-[#1]  
<regId=pyrrole\_G(4)>
97. n1(-[#6])c(c(-[#1])c(c1-[#6]-[#1])-[#6]-2-[#6](=[#8])-[#6&!#1]-[#6]=,:[#1]-2)-[#1]-[#1]  
<regId=ene\_five\_het\_K(4)>



138. [#7]=, [#6]-, :1-, [#7]=, [#6]-, [#7]-, [#16]-, :1 <regId=het\_thio\_N\_5A(3)>  
139. [#7]-, :2-, :[#16]-, :[#6]-1=, :[#6](-[#6]#[#6]-[#7]-[#6]-1)-, :[#6]-, :2=[#16] <regId=het\_thio\_N\_65A(3)>  
140. [#6](-[#1])(-[#1])-[#7](-[#6](-[#1])-[#1])-c:1:c:(c:(c:(c:1-[#1])-[#1])-[#6](-[#1])=[#7]-[#7]=[#6](-[#6])-[#6]#[#6])-[#1])-[#1] <regId=anil\_di\_alk\_J(3)>  
141. n1-2cccc1-[#6]=[#7](-[#6])-[#6]-[#6]-2 <regId=pyrrole\_H(3)>  
142. [#6](-[#6]#[#7])(-[#6]#[#7])=[#6](-[#16])-[#16] <regId=ene\_cyano\_D(3)>  
143. [#6]-1(-[#6]#[#7])(-[#6]#[#7])-[#6](-[#1])(-[#6](-[#8])-[#6])-[#6]-1-[#1] <regId=cyano\_cyano\_B(3)>  
144. [#6]-1=, :[#6]-[#6](-[#6](-[#8]), \$([#16])-1)=[#6]-[#6]=[#8]=[#8] <regId=ene\_five\_het\_M(3)>  
145. [#6]:[#6]-[#6](-[#8])-[#7](-[#1])-[#6](-[#8])-[#6](-[#6]#[#7])=[#6](-[#1])-[#7](-[#1])-[#6]:[#6] <regId=cyano\_ene\_amine\_C(3)>  
146. c:1:(c:c:c:c:1)-[#7](-[#1])-[#6](-[#16])-[#7](-[#1])-[#7]=[#6]-c:2:c:n:c:c:2 <regId=thio\_urea\_I(3)>  
147. [#7](-[#1])(-[#1])-[#6]-2=[#6](-[#6]#[#7])-[#6](-[#1])(-[#1])-c:1:c:c:c:s:1)-[#6](-[#6](-[#1])-[#1])-[#8]-2)-[#6](-[#8])-[#8]-[#6] <regId=dhp\_amino\_CN\_F(3)>  
148. c:1:c-3:c:(c:c:c:1)-[#6](-[#8])-[#7](-[#1])-c:2:c:(c:c:c:c:2)-[#6](-[#8])-[#8]-[#1])-[#6](-[#7](-[#6]-3=[#8])-[#6](-[#1])-[#1])=[#8] <regId=anthranil\_acid\_B(3)>  
149. [C]1-c:2:c:1:n:o:n:c:1:c:c:2 <regId=diazox\_B(3)>  
150. [#6]-[#6](-[#16])-[#1] <regId=thio\_aldehyd\_A(3)>  
151. [#6;X4]-[#7](-[#1])-[#6](-[#6]:[#6])=[#6](-[#1])-[#6](-[#16])-[#7](-[#1])-c:1:c:c:c:c:1 <regId=thio\_amide\_B(2)>  
152. [#6](-[#1])(-[#1])-[#6](-[#1])(-[#1])-[#16]-[#6](-[#1])(-[#1])-c1cn(cn1)-[#1] <regId=imidazole\_B(2)>  
153. [#8]=[#6]-[#7](-[#1])-c:1:c(-[#6]:[#6]):n:c(-[#6](-[#1])(-[#1])-[#6]#[#7]):s:1 <regId=thiazole\_amine\_E(2)>  
154. [#6](-[#1])-[#7](-[#1])-c:1:n:c:(c:s:1)-c2cnc3n2ccs3 <regId=thiazole\_amine\_F(2)>  
155. [#7]-, :1-, :[#6](-[#8]), :[#6](-, :[#6](-[#6]), :[#16]-, :[#6]-, :1=[#16])-[#1] <regId=thio\_ester\_C(2)>  
156. [#6](-[#16])(-[#7])=[#6](-[#1])-[#6](-[#6](-[#1])-[#6](-[#8]) <regId=ene\_one\_B(2)>  
157. [#8]=[#6]-3-c:1:c:(c:c:c:c:1)-[#6]-2=[#6](-[#8]-[#1])-[#6](-[#8])-[#7]-c:4:c-2-c-3:c:c:c:4 <regId=quinone\_C(2)>  
158. c:1:2:c:c:c:(c:1:c:(c:c:c:2)-\$([#8]-[#1]), \$([#7](-[#1])-[#1]))-[#6](-[#6])=[#8] <regId=keto\_naphthol\_A(2)>  
159. [#6](-[#1])(-c:1:c:c:c:c:1)-(-c:2:c:c:c:c:2)-[#6](-[#16])-[#7]-[#1] <regId=thio\_amide\_C(2)>  
160. [#7]-2(-[#6](-[#8])-c:1:c:(c:c:(c:c:1-[#1])-[#6](-[#8])-[#8]-[#1])-[#1])-[#1])-[#6]-2=[#8]-c:3:c:(c:c:(c:c:3)-[#1])-[#8])-[#1] <regId=phthalimide\_misc(2)>  
161. c:1:c:c:(c:c:c:1-[#7](-[#1])-[#16](-[#8])=[#8])-[#7](-[#1])-[#16](-[#8])=[#8] <regId=sulfonamide\_D(2)>  
162. [#6](-[#1])-[#7](-[#1])-c:1:c:(c:(c:(c:1-[#1])-[#1])-[#1])-[#1])-[#7](-[#1])-[#6]-[#1] <regId=anil\_NH\_alk\_C(2)>  
163. s1c(c(-, :2c1-, :[#7](-[#1]), :[#6](-, :[#6](-, :2-[#1])-[#6](-[#8])-[#8]-[#1])=[#8])-[#7](-[#1])-[#1])-[#6](-[#8])-[#7]-[#1] <regId=het\_65\_E(2)>  
164. c:2:(c:1:c:(c:(c:(c:1:c:(c:c:2-[#1])-[#1])-[#1])-[#1])-[#7](-[#1])-[#7](-[#1])-[#6](-[#8])-[#1])-[#1])-[#1] <regId=hzide\_naphth(2)>  
165. [#6](-[#1])(-[#1])-c:1:c:(c:(c:(c:1-[#8]-[#6](-[#1])-[#1])-[#1])-[#1])-[#6](-[#1])(-[#1])-[#7](-[#1])-[#6;X4])-[#1] <regId=anisol\_B(2)>  
166. [#6]-1=[#6]-[#7]-[#6](-[#16]-[#6;X4]-1)=[#16] <regId=thio\_carbam\_ene(2)>  
167. [#6](-[#7](-[#6]-[#1])-[#6]-[#1]):[#6]-[#7](-[#1])-[#6](-[#16])-[#6]-[#1] <regId=thio\_amide\_D(2)>  
168. n2nc1cccc1c2-[#6]-[#6] <regId=het\_65\_Da(2)>  
169. s:1:c:(c(-[#1]):c:(c:1-[#6](-[#8])-[#7](-[#1])-[#7]-[#1])-[#8]-[#6](-[#1])-[#1])-[#1] <regId=thiophene\_D(2)>  
170. [#6]-1:[#6]-[#7]=[#6]-[#6](-[#6]-[#7]-[#6])-[#16]-1 <regId=het\_thio\_6\_ene(2)>  
171. [#6](-[#1])(-[#1])-[#6](-[#1])(-[#6]#[#7])-[#6](-[#8])-[#6] <regId=cyano\_keto\_A(2)>  
172. c2(c(-[#7](-[#1])-[#1])n(-c:1:c:c:c:c:1-[#6](-[#8])-[#8]-[#1])nc2-[#6](-[#8])-[#6]#[#7]), \$([#6]#[#7]), \$([#6]#[#16]) <regId=anthranil\_acid\_C(2)>  
173. c:2:c:1:c:c:c:-, :3:c:1:c:(c:c:2)-, :[#7](-, :[#7]=, :[#6]-, :3)-[#1] <regId=naphth\_amine\_C(2)>  
174. c:2:c:1:c:c:c:-, :3:c:1:c:(c:c:2)-, :[#7]=, :[#7]=, :[#7]=, :3 <regId=naphth\_amine\_D(2)>  
175. c1csc(n1)-[#7]-[#7]-[#16](-[#8])=[#8] <regId=thiazole\_amine\_G(2)>  
176. c:1:c:c:c:2:c:(c:1):n:c:(n:c:2)-[#7](-[#1])-[#6]-3=[#7]-[#6](-[#6]#[#6]-[#7]-3-[#1])(-[#6](-[#1])-[#1])-[#6](-[#1])-[#1] <regId=het\_66\_B(2)>  
177. c:1-, :3:c:(c:(c:(c:1)-[#8]-[#6]-[#1])-[#1])-, :c:2:c:(c:(c:(c:2-[#1])-[#1])-[#8]-[#6](-[#1])-[#1])-[#1])-, :[#6](-[#8])-, :[#8]-, :3 <regId=coumarin\_A(2)>  
178. c:12:c:(c:c:n:1)c(c(-[#6](-[#8])-[#8;X1])s2)-[#7](-[#1])-[#1] <regId=anthranil\_acid\_D(2)>  
179. c:1:2:n:c:(c:(n:c:1-[#6]:[#6]:[#6]:!#1):2)-[#6](-[#1])=[#6](-[#8]-[#1])-[#6]-[#6](-[#1])=[#6](-[#8]-[#1])-[#6] <regId=het\_66\_C(2)>  
180. c1csc(c1-[#7](-[#1])-[#1])-[#6](-[#1])=[#6](-[#1])-c2cccs2 <regId=thiophene\_amine\_E(2)>  
181. c:2:c:c:1:n:c:3:c:(n:c:1:c:c:2):c:c:c:4:c:3:c:c:c:c:4 <regId=het\_6666\_A(2)>  
182. [#6]:[#6]-[#7](-[#1])-[#16](-[#8])=[#8])-[#7](-[#1])-[#6]:[#6] <regId=sulfonamide\_E(2)>  
183. c:1:c:c:(c:c:c:1-[#7](-[#1])-[#1])-[#7](-[#6;X3])-[#6;X3] <regId=anil\_di\_alk\_K(2)>  
184. [#7]-2=[#6](-c:1:c:c:c:c:1)-[#6](-[#1])(-[#1])-[#6](-[#8]-[#1])(-[#6](-[#9])(-[#9])-[#9])-[#7]-2-\$([#6]:[#6]:[#6]:[#6]:[#6]), \$([#6](-[#16])-[#6]:[#6]:[#6]:[#6]:[#6]) <regId=het\_5\_C(2)>  
185. c:1:c:(c:c:c:c:1)-[#6](-[#8])-[#6](-[#1])=[#6]-, :3-, :[#6](-[#8]), :[#7](-[#1]), :[#6](-[#8]), :[#6](-[#6](-[#1])-c:2:c:c:c:c:2)-, :[#7]-, :3-[#1] <regId=ene\_six\_het\_B(2)>  
186. [#8]=[#6]-4-[#6]-[#6]-[#6]-3-[#6]-2-[#6](-[#8])-[#6]-[#6]-1-[#6]-[#6]-[#6]-1-[#6]-2-[#6]-[#6]-[#6]-3=[#6]-4 <regId=steroid\_A(2)>

187. c:1:2:c:3:c:(-[#8]-[#1]):c:(c:1:c:(c:n:2-[#6])-[#6]=[#8])-[#1]:n:c:n:3 <regId=het\_565\_A(2)>  
188. [#6;X4]-[#7+]-[#6;X4]-[#8]-[#1]=[#6]-[#16]-[#6]-[#1] <regId=thio\_imine\_ium(2)>  
189. [#6]-3(=[#8])-[#6](=[#6](-[#1])-[#7](-[#1])-[#1])-[#1])-[#6](=[#8])-[#8]-[#1]-[#7]=[#6](-c:2:c:c:c:c:2)-[#8]-3  
<regId=anthranil\_acid\_E(2)>  
190. c:1:(c:(c:[c;!H0,\$(c-[#6;!H0;!H1])](:o:1)))-[#1]-[#1]-[#6;!H0,\$([#6]-[#6;!H0;!H1])]=[#7]-[#7](-[#1])-  
c:2:c:c:n:c:2 <regId=hzone\_furan\_B(2)>  
191. c:1:(c:(c:[c;!H0,\$(c-[#6;!H0;!H1])](:s:1)))-[#1]-[#1]-[#6;!H0,\$([#6]-[#6;!H0;!H1])]-[#6](=[#8])-[#7](-[#1])-  
c:2:n:c:c:s:2 <regId=thiophene\_E(2)>  
192. [#6]:[#6]-[#6](-[#1])-[#6](-[#1])-[#6](-[#1])-[#6]=[#8])-[#7]-2-[#6](=[#8])-[#6]-1(-[#1])-[#6](-[#1])-[#6]=[#6]-  
[#6](-[#1])-[#6]-1(-[#1])-[#6]-2=[#8] <regId=ene\_misc\_B(2)>  
193. [#6]-1(-[#6]=[#8])-[#6]:[#6]-[#16;X2]-[#6]=[#7]-[#7]-1-[#1] <regId=het\_thio\_5\_B(2)>  
194. [#7](-[#1])-[#1]-c:1:c:(c:(s:1)-[#7](-[#1])-[#6](=[#8])-c:2:c:c:c:c:2)-[#6]#[#7]-  
[#6]:3:[#1]:[#1]:[#1]:[#1]:[#1]:3 <regId=thiophene\_amino\_F(2)>  
195. [#6](-[#1])-[#1]-[#8]-c:1:c:(c:(c:(c:1-[#1])-[#1])-[#6](-[#1])-[#1])-[#7](-[#1])-[#6](-[#1])-[#1])-  
c:2:c:c:c:c:2-\$(#[6](-[#1])-[#1]),\$(#[8]-[#6](-[#1])-[#1]) <regId=anil\_OC\_alk\_D(2)>  
196. [#6](-[#1])-[#1]-[#6](-[#6](-[#1])-[#1])-[#1]-[#6](-[#1])-[#1]-[#1]-c:1:c:(c:(c:1-[#1])-[#6](-[#6](-  
[#1])-[#1])-[#6](-[#1])-[#1])-[#6](-[#1])-[#1])-[#8]-[#6](-[#1])-[#7]-[#1]  
<regId=tert\_butyl\_A(2)>  
197. c:1:(c:(o:c:1)-[#6]-[#1])-[#6]=[#7]-[#7](-[#1])-[#6](=[#16])-[#7]-[#1] <regId=thio\_urea\_J(2)>  
198. [#7](-[#1])-c1nc(nc2nnc(n12)-[#16]-[#6])-[#7](-[#1])-[#6] <regId=het\_thio\_65\_B(2)>  
199. c:1-;2:c:(c:c:c:c:1-[#6](-[#1])-[#1])-[#6](-[#1])-[#6](-[#1])-[#1]-;[#6](=;[#6](-[#6](-[#8])-[#7](-[#1])-  
[#6]:[#6])-;[#6](=[#8])-;[#8]-;2)-[#1] <regId=coumarin\_B(2)>  
200. [#6]-2(=[#16])-[#7]-1-[#6]:[#6]-[#7]=[#7]-[#6]-1=[#7]-[#7]-2-[#1] <regId=thio\_urea\_K(2)>  
201. [#6]:[#6]:[#6]:[#6]:[#6]:[#6]-c:1:c:(c:(s:1)-[#7](-[#1])-[#6](=[#8])-[#6]-[#6](=[#8])-[#8]-[#1]  
<regId=thiophene\_amino\_G(2)>  
202. [#7](-[#1])-[#1]-c:1:c:(c:(c:1-[#7](-[#1])-[#6](-[#1])-[#6](-[#1])-[#6](-[#1])-[#1])-[#1])-[#1]-[#1]  
<regId=anil\_NH\_alk\_D(2)>  
203. [#16]=[#6]-;2-;[#7](-[#1])-;[#7]=;[#6](-c:1:c:(c:(c:1-[#1])-[#1])-[#8]-[#6](-[#1])-[#1])-[#1])-;[#8]-;2  
<regId=het\_thio\_5\_C(2)>  
204. [#16]=[#6]-c:1:c:c:c:2:c:c:c:n:1:2 <regId=thio\_keto\_het(2)>  
205. [#6]~1~[#6](-[#7]~[#7]~[#6](-[#6](-[#1])-[#1])~[#6](-[#1])-[#1])~[#7]~[#16]~[#6]~1  
<regId=het\_thio\_N\_5B(2)>  
206. [#6]-1(-[#6]=;[#6]-[#6]=;[#6]-[#6]-1=[#6&!#1])=[!#6&!#1] <regId=quinone\_D(2)>  
207. [#6](-[#1])-[#1]-[#7](-[#6](-[#1])-[#1])-c:1:c(-[#1]):c:(c:(o:1)-[#6](-[#1])-[#6]-[#6]#[#7])-[#1]  
<regId=anil\_di\_alk\_furan\_B(2)>  
208. [#8]=[#6]-1-[#6]:[#6]-[#6](-[#1])-[#1]-[#7]-[#6]-1=[#6]-[#1] <regId=ene\_six\_het\_C(2)>  
209. [#6]:[#6]-[#7]:2:[#7]:[#6]:1-[#6](-[#1])-[#1]-[#16;X2]-[#6](-[#1])-[#1]-[#6]:1:[#6]:2-[#7](-[#1])-[#6](=[#8])-  
[#6](-[#1])-[#6]-[#1] <regId=het\_55\_A(2)>  
210. n:1:c:(n:(c:2:c:1:c:(c:c:2)-[#6](-[#1])-[#1])-[#16]-[#6](-[#1])-[#1])-[#6](=[#8])-[#7](-[#1])-[#7]=[#6](-[#1])-[#6](-  
[#1])-[#6]-[#1] <regId=het\_thio\_65\_C(2)>  
211. c:1:(c:(c:(c:1-[#8]-[#1])-[#6](!@#[6]-[#7])-[#6]=[#8])-[#8]-[#1] <regId=hydroquin\_A(2)>  
212. c:1:(c:(c:(c:c:1)-[#7](-[#1])-[#6](=[#8])-[#6]:[#6]-[#6](=[#8])-[#8]-[#1])-[#8]-[#1]  
<regId=anthranil\_acid\_F(2)>  
213. n2(-[#6](-[#1])-[#1])c-1c(-[#6]:[#6]-[#6]-1=[#8])cc2-[#6](-[#1])-[#1] <regId=pyrrole\_I(2)>  
214. [#6](-[#1])-[#7](-[#1])-c:1:c:(c:(s:1)-[#6]-[#1])-[#6]-[#1]-[#6](=[#8])-[#7](-[#1])-[#6]:[#6]  
<regId=thiophene\_amino\_H(2)>  
215. [#6]:[#6]-[#7]:!R=[#6]-2-[#6](=[#6&!#1])-c:1:c:c:c:c:1-[#7]-2 <regId=imine\_one\_fives\_C(2)>  
216. c:1:c:c:c:c:1-[#6](-[#8])-[#7](-[#1])-[#7]=[#6]-3-c:2:c:c:c:c:2-c:4:c:c:c:c:3:4  
<regId=keto\_phenone\_zone\_A(2)>  
217. c:1:c:(c:(c:c:1)-[#7](-[#6](-[#1])-[#1])-[#6](-[#1])-[#6](!@#[6](-[#1])-[#6](-[#1])-[#6]-[#6]@#[7]-  
c:2:c:c:c:c:2 <regId=dyes7A(2)>  
218. [#6]:1:2:[#1]:[#7+](:[!#1]:[#6;!H0,\$([#6]-[\*])](:[!#1]:1:[#6]:[#6]:[#6]:[#6]:2))~[#6]:[#6]  
<regId=het\_pyridiniums\_B(2)>  
219. [#7]-2(-c:1:c:c:c:c:1)-[#7]=[#6](-[#6](-[#1])-[#1])-[#6](-[#1])-[#16]-[#6]-[#6]-2=[#8]  
<regId=het\_5\_D(2)>  
220. c:1:c:c:(c:(c:1-[#7](-[#1])-c2nc(c(-[#1])s2)-c:3:c:c:(c:c:3)-[#6](-[#1])-[#6]-[#1])-[#6](-[#1])-[#6](=[#8])-[#8]-  
[#1] <regId=thiazole\_amine\_H(1)>  
221. [#6](-[#1])-[#1]-[#7](-[#1])-[#6]=[#7]-[#7](-[#1])-c1nc(c(-[#1])s1)-[#6]:[#6] <regId=thiazole\_amine\_I(1)>  
222. [#6]:[#6]-[#7](-[#1])-[#6](=[#8])-c1c(snn1)-[#7](-[#1])-[#6]:[#6] <regId=het\_thio\_N\_5C(1)>  
223. [#8]=[#16](=[#8])-[#6]:[#6]-[#7](-[#1])-c1nc(cs1)-[#6]:[#6] <regId=sulfonamide\_F(1)>  
224. [#8]=[#16](=[#8])-[#6]:[#6]-[#7](-[#1])-[#7](-[#1])-c1nc(cs1)-[#6]:[#6] <regId=thiazole\_amine\_J(1)>  
225. s2c:1:n:c:n:c:c:1c(c2-[#6](-[#1])-[#1])-[#6](-[#1])-[#1])-[#7]-[#7]=[#6]-c3ccc3 <regId=het\_65\_F(1)>  
226. [#6](=[#8])-[#6](-[#1])-[#6](-[#8]-[#1])-[#6](-[#8]-[#1])-[#6](-[#1])-[#6](=[#8])-[#6]  
<regId=keto\_keto\_beta\_E(1)>  
227. c:2:(c:1-[#6](-[#6](-[#6](-c:1:c:(c:(c:2-[#1])-[#1])-[#1])-[#1])-[#1])-[#1])-[#8])-[#6](-[#6](-[#1])-[#1])-[#6](-[#1])-  
[#1])-[#1] <regId=ene\_five\_one\_B(1)>





308. [#16;X2]-1-[#6]=[#6](-[#6]#[#7])-[#6](-[#6])(-[#6]=[#8])-[#6](-[#6]-1-[#7](-[#1])-[#1])-  
[\$([#6]=[#8]),\$([#6]#[#7])] <regId=dhp\_amino\_CN\_G(1)>  
309. [#7]-2-[#6]=[#6](-[#6]=[#8])-[#6](-c:1:c:c:c:c:1)-[#7](-[#6](-[#1])-[#1])-[#6](-[#1])-[#1])-[#6]~3=;[#6]-  
2~[#7]~[#6]~[#6]~[#6]~[#6]~3~[#7] <regId=anil\_di\_alk\_dhp(1)>  
310. c:1:c:(c:c:c:1)-[#6](-[#8])-[#7](-[#1])-c:2:c:(c:c:c:c:2)-[#6](-[#8])-[#7](-[#1])-[#6](-[#1])-c:3:n:c:c:s:3  
<regId=anthranil\_amide\_A(1)>  
311. c:1:c:2:c:(c:c:c:1):c:(c:3:c:(c:2):c:c:c:c:3)-[#6]=[#7]-[#7](-[#1])-c:4:c:c:c:c:c:4<regId=hzone\_anthran\_Z(1)>  
312. c:1:c:(c:c:c:c:1)-[#6](-[#1])-[#7]-[#6](-[#8])-[#6](-[#7](-[#1])-[#6](-[#1])-[#1])=[#6](-[#1])-[#6](-[#8])-  
c:2:c:c:c:(c:c:2)-[#8]-[#6](-[#1])-[#1] <regId=ene\_one\_amide\_A(1)>  
313. s:1:c:(c(-[#1]):c:(c:1-[#6]-3=[#7]-c:2:c:c:c:c:2-[#6](-[#7]-[#7]-3-[#1])-c:4:c:n:c:c:4)-[#1])-[#1]  
<regId=het\_76\_A(1)>  
314. o:1:c:(c(-[#1]):c:(c:1-[#6](-[#1])-[#7](-[#1])-[#6](-[#16])-[#7](-[#6](-[#1])-[#6](-[#1])(-[#1])-c:2:c:c:c:c:c:2)-  
[#1])-[#1] <regId=thio\_urea\_N(1)>  
315. c:1:c:(c:c:c:c:1)-[#7](-[#6](-[#1])-[#6](-[#1])-[#6](-[#1])-[#6](-[#1])-[#7](-[#1])-[#6](-[#8])-[#6]-,2=,:[#6](-,:[#8]-  
,:[#6](-,:[#6](-,:[#6](-,2-[#6](-[#1])-[#1])-[#1])=[#8])-[#6](-[#1])-[#1] <regId=anil\_di\_alk\_coum(1)>  
316. c:2-3:c:c:c:1:c:c:c:c:1:c:2-[#6](-[#1])-[#6;X4]-[#7]-[#6]-3=[#6](-[#1])-[#6](-[#8])-[#7](-[#6](-[#1])-[#1])-[#6](-  
[#1])-[#1] <regId=ene\_one\_amide\_B(1)>  
317. c:1:c:(c:c:c:1)-[#6]-4=[#7]-[#7]:2:[#6](:[#7+]:c:3:c:2:c:c:c:3)-[#16]-[#6;X4]-4 <regId=het\_thio\_656c(1)>  
318. [#6]-2(=[#8])-[#6](-[#6](-[#1])-[#1])-[#7](-[#1])-[#6](-[#1])(-[#1])-[#6](-[#1])(-[#1])-[#6](-[#1])-[#1])-  
[#7]=[#6](-c:1:c:c:c:c:1)-[#8]-2 <regId=het\_5\_ene(1)>  
319. c:1:c:(c:c:c:c:1)-[#7]-2-[#6](-[#8])-[#6](-[#6](-[#1])-[#6]-2=[#8])-[#16]-c:3:c:c:c:c:3 <regId=thio\_imide\_A(1)>  
320. [#7]-,1(-[#1])-,:[#7]=,:[#6](-[#7]-[#1])-,:[#16]-,:[#6](-,:[#6]-,1-,:[#6]:[#6])-,:[#6]:[#6]  
<regId=dhp\_amidine\_A(1)>  
321. c:1:(c:c:3:c:(c:c:1-[#7](-[#1])-[#6](-[#16])-[#7](-[#1])-[#6](-[#1])-c:2:c:(c:(o:2)-[#6](-[#1])-[#1])-[#1])-[#1])-  
[#8]-[#6](-[#8]-3)(-[#1])-[#1])-[#1] <regId=thio\_urea\_O(1)>  
322. c:1:(c:c:(c:c:c:1-[#7](-[#1])-[#6](-[#16])-[#7](-[#1])-c:2:c:c:c:c:2)-[#1])-[#7](-[#6](-[#1])-[#1])-[#6](-[#1])-  
[#1])-[#1])-[#1] <regId=anil\_di\_alk\_O(1)>  
323. [#8]=[#6]!@n:1:c:c:c-,2:c:1-,:[#7](-[#1])-,:[#6](-[#16])-,:[#7]-,2-[#1] <regId=thio\_urea\_P(1)>  
324. [#6](-[F])(-[F])-[#6](-[#8])-[#7](-[#1])-c:1:c(-[#1]):n(-[#6](-[#1])(-[#1])-[#6](-[#1])(-[#1])-[#8]-[#6](-[#1])(-[#1])-  
[#6]:[#6]):n:c:1-[#1] <regId=het\_pyraz\_misc(1)>  
325. [#7]-2=[#7]-[#6]:1:[#7]:!#6&!#1:[#7]:[#6]:1-[#7]=[#7]-[#6]:[#6]-2 <regId=diazox\_C(1)>  
326. [#6]-2(-[#1])(-[#8]-[#1])-[#6]:1:[#7]:!#6&!#1:[#7]:[#6]:1-[#6](-[#1])(-[#8]-[#1])-[#6]=[#6]-2  
<regId=diazox\_D(1)>  
327. [#6]-1(-[#6](-[#1])(-[#1])-[#6](-[#1])(-[#1])-[#6](-[#8])-[#7](-[#1])-c:2:c:c:(c:c:2)-[#8]-[#6](-[#1])(-[#1])-  
[#8])-[#16](-[#8])(=[#8])-[#6]:[#6] <regId=misc\_cyclopropane(1)>  
328. [#6]-1-[#6]-[#6](-[#8])-[#6]=[#6]-1-[#7]=[#6](-[#1])-[#7](-[#6;X4])-[#6;X4] <regId=imine\_ene\_one\_B(1)>  
329. c:1:c:c:(c:c-,2:c:1-,:[#6](-,:[#6](-[#1])-,:[#6](-[#8])-,:[#8]-,2)-c:3:c:c:c:c:3)-[#8]-[#6](-[#1])(-[#1])-  
[#6]:[#8]:[#6] <regId=coumarin\_D(1)>  
330. c:1:c:(c:c:c:1-[#6](-[#1])-[#1])-[#6](-[#1])-[#1])-[#6](-[#1])(-[#1])-[#7]-[#6](-[#1])(-[#1])-[#6](-[#1])(-[#8]-[#6](-  
[#1])-[#1])-[#6](-[#1])(-[#1])-[#8]-c:2:c:c-3:c:(c:c:2)-[#8]-[#6](-[#8]-3)(-[#1])-[#1] <regId=misc\_furan\_A(1)>  
331. [#7]-4(-c:1:c:c:c:c:1)-[#6](-[#8])-[#16]-[#6](-[#1])(-[#7](-[#1])-c:2:c:c:c:c:3:c:c:c:c:2:3)-[#6]-4=[#8]  
<regId=rhod\_sat\_E(1)>  
332. [#7]-3(-[#6](-[#8])-c:1:c:c:c:c:1)-[#6](-[#7]-c:2:c:c:c:c:2)-[#16]-[#6](-[#1])(-[#1])-[#6]-3=[#8]  
<regId=rhod\_sat\_imine\_A(1)>  
333. [#7]-2(-c:1:c:c:c:c:1)-[#6](-[#8])-[#16]-[#6](-[#1])(-[#1])-[#6]-2=[#16] <regId=rhod\_sat\_F(1)>  
334. [#7]-1(-[#6](-[#1])-[#1])-[#6](-[#16])-[#7](-[#6]:[#6])-[#6](-[#7]-[#6]:[#6])-[#6]-1=[#7]-[#6]:[#6]  
<regId=het\_thio\_5\_imine\_B(1)>  
335. [#16]-1-[#6](-[#7]-[#7]-[#1])-[#16]-[#6](-[#7]-[#6]:[#6])-[#6]-1=[#7]-[#6]:[#6]  
<regId=het\_thio\_5\_imine\_C(1)>  
336. [#6]-2(=[#8])-[#6](-[#6](-[#1])-c:1:c:(c:c:c:c:1)-[F,C1,Br,I])-[#8]-[#6](-[#1])-[#1])-[#7]=[#6](-[#16]-[#6](-[#1])-  
[#1])-[#16]-2 <regId=ene\_five\_het\_N(1)>  
337. [#6](-[#1])(-[#1])-[#16]-[#6](-[#16])-[#7](-[#1])-[#6](-[#1])(-[#1])-[#6]:[#6] <regId=thio\_carbam\_A(1)>  
338. c:1:(c:c:(c:c:c:1-[#1])-[#1])-[#6](-[#1])-[#1])-[#7](-[#1])-[#6](-[#8])-[#6](-[#1])(-[#1])-[#6](-[#1])(-[#1])-  
[#6]:[#6])-[#1])-[#7](-[#1])-[#6](-[#8])-[#6](-[#1])(-[#1])-[#6](-[#1])(-[#1])-[#6]:[#6]  
<regId=misc\_anilide\_A(1)>  
339. c:1:(c:c:(c:c:c:1-[#6](-[#1])-[#1])-[#1])-[Br])-[#1])-[#6](-[#1])-[#1])-[#7](-[#1])-[#6](-[#8])-[#7](-[#1])-[#6](-  
[#1])(-[#1])-[#6](-[#1])(-[#1])-[#6](-[#1])-[#1] <regId=misc\_anilide\_B(1)>  
340. c:1-2:c:(c:c:c:c:1-[#8]-[#6](-[#1])(-[#1])-[#7](-[#6]:[#6]-[#8]-[#6](-[#1])-[#1])-[#6]-2(-[#1])-[#1])-[#1])-[#1]  
<regId=mannich\_B(1)>  
341. c:1-2:c:(c:c:(c:c:1-[#8]-[#6](-[#1])(-[#1])-[#7](-[#6](-[#1])-[#1])-[#6]-2(-[#1])-[#1])-[#1])-[#8])-[#8])-[#1]  
<regId=mannich\_catechol\_A(1)>  
342. [#7](-[#1])(-c:1:c:(c:c:c:1-[#1])-[#1])-[#6](-[#1])(-[#6](-[#1])-[#1])-[#6](-[#1])-[#1])-[#1])-[#1])-[#6](-[#1])(-  
[#1])-[#6](-[#1])(-[#1])-[#7](-[#6](-[#1])-[#1])-[#6](-[#1])-[#1] <regId=anil\_alk\_D(1)>  
343. n:1:2:c:c:(c:c:1:c:c:c:2-[#6](-[#8])-[#6]:[#6])-[#6]:[#6])-[#6](-[#8])-[#8] <regId=het\_65\_I(1)>  
344. c:1:(c:c:(c:c:c:1-[#1])-[#1])-[#6](-[#6](-[#1])-[#1])-[#6](-[#1])-[#1])-[#1])-[#6](-[#6;X4])(-[#6;X4])-[#7](-  
[#1])-[#6](-[#8])-[#7](-[#6](-[#1])(-[#1])-[#6](-[#1])-[#1])-[#6](-[#1])(-[#1])-[#6](-[#1])(-[#1])-[#6](-[#1])-[#6](-  
[#1])(-[#1])-[#6]:[#6] <regId=misc\_urea\_A(1)>





381. [#7](-[#1])(-[#1])-c:1:c:(c:(c:(c:(c:1-[#7](-[#1])-[#16])(=[#8])=[#8])-[#1])-[#7](-[#1])-[#6](-[#1])-[#1])-[F,Cl,Br,I])-[#1] <regId=anil\_NH\_no\_alk\_B(1)>  
382. [#7](-[#1])(-[#1])-c:1:c:(c:(c:(c:(c:1-[#7]([#6]-2-[#6])(=[#6]~[#6]~[#6]~[#6]-2)-[#1])-[#1])-[#1])-[#1])-[#1] <regId=anil\_no\_alk\_A(1)>  
383. [#7](-[#1])(-[#1])-c:1:c:(c:(c:(c:(c:1-n:2:c:c:c:2)-[#1])-[#6](-[#1])-[#1])-[#6](-[#1])-[#1])-[#1] <regId=anil\_no\_alk\_B(1)>  
384. [#16]=[#6]-[#6](-[#1])(-[#1])-[#1])=[#6](-[#6](-[#1])-[#1])-[#7](-[#6](-[#1])-[#1])-[#6](-[#1])-[#1] <regId=thio\_ene\_amine\_A(1)>  
385. [#6]-1-[#6]-[#8]-[#6]-2-[#6](-[#1])(-[#1])-[#6]([#8])-[#8]-[#6]-1-2 <regId=het\_55\_B(1)>  
386. [#8]-[#6]([#8])-[#6](-[#1])(-[#1])-[#16;X2]-[#6]([#7]-[#6]#[#7])-[#7](-[#1])-c:1:c:c:c:c:c:1 <regId=cyanamide\_A(1)>  
387. [#8]=[#6]-[#6]-1=[#6](-[#16])-[#6]([#6](-[#1])-[#6](-[#16]-1)-[#6]#[#8]) <regId=ene\_one\_one\_A(1)>  
388. [#8]=[#6]-1-[#7]-[#7]-[#6]([#7]-[#6]-1=[#6]-[#1])-[!#1]:[!#1] <regId=ene\_six\_het\_D(1)>  
389. [#8]=[#6]-[#6](-[#1])=[#6](-[#6]#[#7])-[#6] <regId=ene\_cyano\_E(1)>  
390. [#8](-[#1])-[#6]([#8])-c:1:c:(c:(c:(c:(c:1-[#8]-[#1])-[#1])-c:2:c(-[#1]):c:(c:(o:2)-[#6](-[#1])-[#6](-[#6]#[#7])-c:3:n:c:c:n:3)-[#1])-[#1])-[#1] <regId=ene\_cyano\_F(1)>  
391. c:1:c:(c:c:c:1)-[#7](-c:2:c:c:c:c:2)-[#7]=[#6](-[#1])-[#6]:3:[#6](:[#6](:[#6](:[#1]:3)-c:4:c:c:c:(c:4)-[#6]([#8])-[#8]-[#1])-[#1])-[#1] <regId=hzone\_furan\_C(1)>  
392. [#7](-[#1])(-[#1])-c:1:c:(c:(c:(c:(c:1-[#1])-[#1])-c:2:c(-[#1]):c:(c(-[#6](-[#1])-[#1]):o:2)-[#6]([#8])-[#1])-[#1] <regId=anil\_no\_alk\_C(1)>  
393. [#8](-[#1])-[#6]([#8])-c:1:c:c:c:(c:c:1)-[#7]-[#7]=[#6](-[#1])-[#6]:2:[#6](:[#6](:[#6](:[#1]:2)-c:3:c:c:c:c:3)-[#1])-[#1] <regId=hzone\_acid\_D(1)>  
394. [#8](-[#1])-[#6]([#8])-c:1:c:c:c:(c:c:1)-[#6]:[!#1]:[#6]-[#6]=[#7]-[#7](-[#1])-[#6]([#8])-[#6](-[#1])-[#1])-[#8] <regId=hzone\_furan\_E(1)>  
395. [#8](-[#1])-[#6]:1:[#6](:[#6]:[!#1]:[#6](:[#7]:1)-[#7](-[#1])-[#1])-[#6](-[#1])-[#1])-[#6]([#8])-[#8] <regId=het\_6\_pyridone\_NH2(1)>  
396. [#6]-1([#6&!#1])-[#6](-[#7])=[#6]-[#16]-1=[#8] <regId=imine\_one\_fives\_D(1)>  
397. n2(-c:1:c:c:c:c:c:1)c(c(-[#1])c(c2-[#6]#[#7]-[#8]-[#1])-[#1])-[#1] <regId=pyrrole\_M(1)>  
398. n2(-[#6](-[#1])-c:1:c:(c:(c:(c:(c:1-[#1])-[#1])-[#1])-[#1])c(c(-[#1])c(c2-[#6](-[#1])-[#1])-[#6]-[#1] <regId=pyrrole\_N(1)>  
399. n1(-[#6](-[#1])-[#1])c(c(-[#6]([#8])-[#6])c(c1-[#6]:[#6])-[#6]-[#6](-[#1])-[#1] <regId=pyrrole\_O(1)>  
400. n1(-[#6])c(c(-[#1])c(c1-[#6](-[#1])=[#6](-[#6]#[#7])-c:2:n:c:c:s:2)-[#1])-[#1] <regId=ene\_cyano\_G(1)>  
401. n3(-c:1:c:c:c:c:1-[#7](-[#1])-[#16])(=[#8])(=[#8])-c:2:c:c:c:s:2)c(c(-[#1])c(c3-[#1])-[#1])-[#1] <regId=sulfonamide\_J(1)>  
402. n2(-c:1:c:(c:(c:(c:(c:1-[#1])-[#1])-[#1])-[#1])-[#6]([#8])-[#7](-[#1])-[#6](-[#1])-[#6](-[#1])-[#1])-[#6](-[#1])-[#1])-[#8]-[#6]:[#6]c(c(-[#1])c(c2-[#1])-[#1])-[#1] <regId=misc\_pyrrole\_benz(1)>  
403. c:1:(c:c:c:c:1)-[#7](-[#1])-[#6]([#16])-[#7]-[#7](-[#1])-[#6](-[#1])=[#6](-[#1])-[#6]#[#8] <regId=thio\_urea\_R(1)>  
404. [#6]-1(-[#6]([#8])-[#6](-[#1])-[#6](-[#1])-[#6]-1=[#8])=[#6](-[#7]-[#1])-[#6]#[#8] <regId=ene\_one\_one\_B(1)>  
405. [#7](-[#1])(-[#1])-[#6]-1=[#6](-[#6]#[#7])-[#6](-[#1])-[#6]:[#6]-[#16]-[#6;X4]-[#16]-1 <regId=dhp\_amino\_CN\_H(1)>  
406. [#6](-[#1])(-[#1])-[#8]-c:1:c:(c:(c:(c:(c:1-[#1])-[#1])-[#1])-[#1])-[#7](-[#1])-c:2:c:c:n:c:3:c:(c:c:c:(c:2:3)-[#8]-[#6](-[#1])-[#1])-[#8]-[#6](-[#1])-[#1] <regId=het\_66\_anisole(1)>  
407. [#6](-[#1])(-[#1])-[#8]-c:1:c:(c:(c:(c:(c:1-[#1])-[#1])-[#8]-[#6](-[#1])-[#1])-[#1])-[#7](-[#1])-c:2:n:c:(c:s:2)-c:3:c:c:c:(c:c:3)-[#8]-[#6](-[#1])-[#1] <regId=thiazole\_amine\_N(1)>  
408. [#6]-1~3-[#7](-[#6]:[#6])~[#6]~[#6]~[#6]~[#6]-1~[#6]~2~[#7]~[#6]~[#6]~[#6]~[#7+]~2~[#7]~3 <regId=het\_pyridiniums\_C(1)>  
409. [#7]-3(-c:2:e:1:c:c:c:c:1:c:e:c:2)-[#7]=[#6](-[#6](-[#1])-[#1])-[#6](-[#1])-[#1])-[#6]-3=[#8] <regId=het\_5\_E(1)>  
410. [#6]-1([#6;!H0,\$([#6]-[#6;!H0;!H1]),\$([#6]-[#6]#[#8])-[#16]-[#6](-[#7;!H0,\$([#7]-[#6;!H0]),\$([#7]-[#6]:[#6])]-1)=[#7;!R])-\$([#6](-[#1])-[#1]),\$([#6]:[#6]) <regId=thiaz\_ene\_A(128)>  
411. n2(-[#6]:1:[!#1]:[#6]:[#6]:[#6]:1)c(cc(c2-[#6;X4]-[#1])-[#6;X4] <regId=pyrrole\_A(118)>  
412. c:1:c:c:(c:(c:1)-[#8]-[#1])-[#8]-[#1] <regId=catechol\_A(92)>  
413. [#6]-1([#6]-[#6](-[#7])=[#6]-[#16]-1)=[#8] <regId=ene\_five\_het\_B(90)>  
414. [#6]-1([#1]-[#6&!#1]-[#6](-[#6]-1=[#6&!#1;!R])=[#8] <regId=imine\_one\_fives(89)>  
415. [#6]-1(-[#6](-[#6]#[#6]-[#6&!#1]-1)=[#6]#[#6&!#1] <regId=ene\_five\_het\_C(85)>  
416. [#6]-[#7]-1-[#6](-[#1])(-[#1])-[#6](-[#1])(-[#1])-[#7](-[#6](-[#1])(-[#1])-[#6]-1(-[#1])-[#1])-[#7]=[#6](-[#1])-[#6]:[!#1] <regId=hzone\_pipzn(79)>  
417. c:1-2:c:(c:c:c:1)-[#6]([#8])-[#6;X4]-[#6]-2=[#8] <regId=keto\_keto\_beta\_A(68)>  
418. n1(-[#6]c(c(-[#1])c(c1-[#6]#[#7]-[#7])-[#1])-[#1] <regId=hzone\_pyrrol(64)>  
419. [#6](!@[#6](-[#1])-@[#6](!@[#6&!#1])-@[#6](!@[#6]-[#1])-[#1] <regId=ene\_one\_ene\_A(57)>  
420. [#6](-[#6]#[#7])(-[#6]#[#7])-[#6](-[#7](-[#1])-[#1])=[#6]-[#6]#[#7] <regId=cyano\_ene\_amine\_A(56)>  
421. c:1-2:c:(c:c:c:1)-[#6]([#8])-[#6]([#6]-[#6]-2=[#8] <regId=ene\_five\_one\_A(55)>  
422. [#6]-:1(=,:[!#1]-,:[!#1]=,:[!#1]-,:[#7](-,:[#6]-,;1=[#16])-[#1])-[#6]#[#7] <regId=cyano\_pyridone\_A(54)>  
423. c:1:c:c-2:c:(c:c:1)-[#6]-3-[#6](-[#6]-[#7]-2)-[#6]-[#6]#[#6]-3 <regId=anil\_alk\_ene(51)>  
424. c:1:c:2:c:(c:c:1):n:c:3:c:(c:2-[#7]):c:c:c:3 <regId=amino\_acridine\_A(46)>



468. [n;!H0,\$(n-[#6;!H0;!H1]):1(c(c(c:2:c:1:c:c:c:2-[#1])-[#6;X4]-[#1])-[#6](-[#1])-[#1]),\$([#6]=,:[!#6&!#1]),\$([#6](-[#1])-[#7]),\$([#6](-[#1])(-[#6](-[#1])-[#1])-[#6](-[#1])(-[#1])-[#7](-[#1])-[#6](-[#1])-[#1])) <regId=indol\_3yl\_alk(461)>  
469. [!#6&!#1]=[#6]-1-[#6]=,:[#6]-[#6]([!#6&!#1])-[#6]=,:[#6]-1 <regId=quinone\_A(370)>  
470. [#7;!R]=[#7] <regId=azo\_A(324)>  
471. [#6]-[#6]([!#6&!#1;!R])-[#6]([!#6&!#1;!R])-[#6]([#16]([#8])=[#8]) <regId=imine\_one\_A(321)>  
472. [#7]-[#6;X4]-c:1:c:c:c:c:1-[#8]-[#1] <regId=mannich\_A(296)>  
473. c:1:c:c:c:c:1-[#7](-[#6;X4])-[#6;X4]-[#6]=[#6] <regId=anil\_di\_alk\_B(251)>  
474. c:1:c:c:c:c:1-[#8]-[#6;X4]-[#7,\$([#7!H0]-[#6;X4]),\$([#7](-[#6;X4])-[#6;X4]) <regId=anil\_di\_alk\_C(246)>  
475. [#7]-1-[#6]([!#16])-[#16]-[#6]([!#6])-[#6]-1=[#8] <regId=ene\_rhod\_A(235)>  
476. c:1:(c:c:c:c:c:1)-[#6]=[#7]-[#7]-[#8]-[#1] <regId=hzone\_phenol\_B(215)>  
477. [#6]-1([!#6])-[#6]=[#7]-[!#6&!#1]-[#6]-1=[#8] <regId=ene\_five\_het\_A(201)>  
478. c:1:c:c:c:c:1-[#7](-[#6;X4])-[#6;X4]-[#6;X4]-[\$([#8]-[#1]),\$([#6]=[#6]-[#1]),\$([#7]-[#6;X4]) <regId=anil\_di\_alk\_D(198)>  
479. [#8]=[#6]-2-[#6]([!#7]-[#7])-c:1:c:c:c:c:1-[#7]-2 <regId=imine\_one\_isatin(189)>  
480. [#6](-[#1])-[#7](-[#6](-[#1])-[#1])-c:1:c:c:c:c:1-!H0,\$(c-[#6](-[#1])-[#1])(c:1-[#1])-[#6&!H0;!H1,\$([#6]-[#6;!H0])]-[#1])-[#1] <regId=anil\_di\_alk\_E(186)>

## References

1. Wolber, G.inLanger, T. (2005) LigandScout: 3-d pharmacophores derived from protein-bound Ligands and their use as virtual screening filters. *J. Chem. Inf. Model.*, 45, 160-169.
2. (UCSF), S. L. ZINC docking. <http://zinc15.docking.org/substances/subsets/>.
3. Software, O. S. *OpenEye*, Santa Fe, New Mexico, United States.
4. Shoichet, B. K. (2006) Interpreting steep dose-response curves in early inhibitor discovery. *J Med Chem*, 49 (25), 7274-7277.
5. Baell, J. B.inHolloway, G. A. (2010) New Substructure Filters for Removal of Pan Assay Interference Compounds (PAINS) from Screening Libraries and for Their Exclusion in Bioassays. *J Med Chem*, 53 (7), 2719-2740.
6. Jones, G., Willett, P., Glen, R. C., *et al.* (1997) Development and validation of a genetic algorithm for flexible docking. *J Mol Biol*, 267 (3), 727-748.
7. Verdonk, M. L., Cole, J. C., Hartshorn, M. J., *et al.* (2003) Improved protein-ligand docking using GOLD. *Proteins-Structure Function and Genetics*, 52 (4), 609-623.
8. Jamroz, M, Kolinski, A. (2013) ClusCo: clustering and comparison of protein models. *BMC Bioinformatics*, 14, 62-67.
9. Halgren, T. (2009) Identifying and Characterizing Binding Sites and Assessing Druggability. *J. Chem. Inf. Model.*, 49, 377–389.
10. Halgren, T. (2007) New Method for Fast and Accurate Binding-site Identification and Analysis. *Chem. Biol. Drug Des.*, 69, 146–148.
11. Saubern, S., Guha, R., Baell, J. B. (2011) KNIME Workflow to Assess PAINS Filters in SMARTS Format. Comparison of RDKit and Indigo Cheminformatics Libraries. *Mol. Inform.* 30, 847–850.
